# Supplementary material
Source: PubMed Central journal article supplement (PMC4172547)
Supplement: clpt2014125x1.pdf [file clpt2014125x1.pdf]

## Supplemental Material

### The Clinical Pharmacogenetics Implementation Consortium CPIC guideline for *SLCO1B1* and simvastatin-induced myopathy: 2014 update

**Laura B. Ramsey<sup>1</sup>, Samuel G. Johnson<sup>2,3</sup>, Kelly E. Caudle<sup>1</sup>, Cyrine E. Haidar<sup>1</sup>, Deepak Voora<sup>4</sup>, Russell A. Wilke<sup>5,6</sup>, Whitney D. Maxwell<sup>7</sup>, Howard L. McLeod<sup>8</sup>, Ronald M. Krauss<sup>9</sup>, Dan M. Roden<sup>10,11</sup>, Qiping Feng<sup>10,11</sup>, Rhonda M. Cooper-DeHoff<sup>12</sup>, Li Gong<sup>13</sup>, Teri E. Klein<sup>13</sup>, Mia Wadelius<sup>14</sup>, Mikko Niemi<sup>15</sup>**

<sup>1</sup> Pharmaceutical Sciences Department, St. Jude Children's Research Hospital, Memphis, TN

<sup>2</sup> Skaggs School of Pharmacy and Pharmaceutical Sciences, University of Colorado, Denver, CO

<sup>3</sup> Clinical Pharmacy Services, Kaiser Permanente Colorado, Denver, CO

<sup>4</sup> Department of Medicine, Duke University, Durham, NC

<sup>5</sup> **IMAGENETICS, Sanford Medical Center, Fargo, North Dakota, USA**

<sup>6</sup> **Clinical Professor of Medicine, University of North Dakota, Fargo, North Dakota, USA**

<sup>7</sup> Department of Clinical Pharmacy and Outcomes Sciences, South Carolina College of Pharmacy, Columbia, SC

<sup>8</sup> Moffitt Cancer Center, Tampa, FL USA

<sup>9</sup> Director, Atherosclerosis Research, Children's Hospital Oakland Research Institute, Oakland, CA

<sup>10</sup> Oates Institute for Experimental Therapeutics, Vanderbilt University Medical Center, Nashville, TN

<sup>11</sup> Department of Medicine, Division of Clinical Pharmacology, Vanderbilt University, Nashville, TN

<sup>12</sup> Department of Pharmacotherapy and Translational Research, Center for Pharmacogenomics and Division of Cardiovascular Medicine, University of Florida, Gainesville, FL

<sup>13</sup> Department of Genetics, Stanford University, Palo Alto, CA

<sup>14</sup> Department of Medical Sciences, Clinical Pharmacology, Uppsala University, Uppsala, Sweden

<sup>15</sup> Department of Clinical Pharmacology, University of Helsinki and HUSLAB, Helsinki University

## Table of Contents

|                                                                                                                                                |          |
|------------------------------------------------------------------------------------------------------------------------------------------------|----------|
| CPIC Updates.....                                                                                                                              | 4        |
| CPIC Updates in Supplement v2.0: .....                                                                                                         | 4        |
| Literature Review.....                                                                                                                         | 4        |
| <b>Gene: <i>SLCO1B1</i></b> .....                                                                                                              | <b>5</b> |
| <i>Background</i> .....                                                                                                                        | 5        |
| Available Genetic Test Options .....                                                                                                           | 5        |
| Levels of Evidence.....                                                                                                                        | 5        |
| Strength of Recommendations.....                                                                                                               | 6        |
| Incidental findings .....                                                                                                                      | 7        |
| Other Considerations .....                                                                                                                     | 7        |
| Drug-drug interactions .....                                                                                                                   | 7        |
| The Role of Ancestry. ....                                                                                                                     | 8        |
| Other Limitations. ....                                                                                                                        | 8        |
| Resources to Incorporate Pharmacogenetics into an EHR with CDS.....                                                                            | 10       |
| Supplemental Figure S1. Pharmacokinetic impact of rs4149056 genotype for several statins. ...                                                  | 12       |
| Supplemental Table S1. Genotypes that constitute the * alleles for <i>SLCO1B1</i> .....                                                        | 13       |
| Supplemental Table S2. Association between allelic variants and <i>SLCO1B1</i> (OATP1B1) function .....                                        | 15       |
| Supplemental Table S3. Observed frequencies for select <i>SLCO1B1</i> alleles <sup>a</sup> within major race/ethnic or geographic groups. .... | 17       |
| Supplemental Table S4. Detailed distribution of <i>SLCO1B1</i> allele frequency by race, ethnicity, or geographic groups.....                  | 18       |
| Supplemental Table S5. Evidence linking genotype with phenotype.....                                                                           | 20       |
| Supplemental Table S6. Impact of rs4149056 (V174A) on the pharmacokinetics of various statins .....                                            | 23       |
| Supplemental Table S7. FDA Dosing Recommendations for Simvastatin, posted in 2013.....                                                         | 26       |
| Supplemental Table S8. Drug(s) that pertain to this guideline.....                                                                             | 27       |
| Supplemental Table S9. Gene(s) that pertain to this guideline.....                                                                             | 27       |
| Supplemental Figure S2. <i>SLCO1B1</i> Pharmacogenetic Test Result: Clinical Implementation Workflow for EHR .....                             | 28       |

|                                                                                                                                          |    |
|------------------------------------------------------------------------------------------------------------------------------------------|----|
| Supplemental Figure S3. <i>SLCO1B1</i> Genotype and Simvastatin: Point of Care Clinical Decision Support.....                            | 29 |
| Supplemental Table S10. Example Implementation of this Guideline: Pharmacogenetic Diplotype/Phenotype Summary Entries <sup>a</sup> ..... | 30 |
| Supplemental Table S11. Example Implementation of this Guideline: Point of Care Clinical Decision Support.....                           | 33 |
| References.....                                                                                                                          | 34 |

## CPIC Updates

Clinical Pharmacogenetics Implementation Consortium (CPIC) guidelines are published in full on the PharmGKB website ([www.pharmgkb.org](http://www.pharmgkb.org)). Relevant information will be periodically reviewed and updated guidelines will be published online.

---

### CPIC Updates in Supplement v2.0:

- Literature review from February 2011 to December 2013.
  - Updated *SLCO1B1* \* allele nomenclature and functional status (Supplemental Table S1 and S2)
  - Updated evidence linking *SLCO1B1* genotype to phenotype (Supplemental Table S5).
  - Updated FDA dosing recommendations (Supplemental Table S7)
  - Added resources to facilitate incorporation of *SLCO1B1* pharmacogenetics into an electronic health record with clinical decision support (Supplemental Table S8-S11)
- 

### Literature Review

We searched the PubMed database (1966 to December 2013) and Ovid MEDLINE (1950 to December 2013) using several keyword strategies: *SLCO1B1*, *SLCO1B1* AND myopathy, *SLCO1B1* AND statin myopathy, *SLCO1B1* AND simvastatin, *SLCO1B1* AND LDL lowering, *SLCO1B1* AND statin efficacy, *SLCO1B1* AND statin kinetics AND human AND polymorphism, *SLCO1B1* AND cardiovascular, OR *SLCO1B1* AND statin uptake AND hepatocyte.

To construct tables showing *SLCO1B1* (1966-May 2010) minor allele frequency based on ancestry, the PubMed database was further searched using the following criteria: *SLCO1B1*, *OATP1B1*, population, rs4149056, *SLCO1B1*\*5, *SLCO1B1* \*15. Studies were included if: (A) the race of the population was clearly indicated, (B) allele frequencies or minor allele

percentages for *SLCO1B1* haplotypes were reported, (C) the method by which *SLCO1B1* was genotyped was reliable, (D) the sample size was at least 20 subjects.

## Gene: *SLCO1B1*

### **Background**

*SLCO1B1* (OATP1B1) function associated with the known *SLCO1B1* allelic variants is summarized in **Supplemental Table S2**. The dosing recommendations in this guideline are specific for variant alleles in which there are clear data linking the *SLCO1B1* genotype to statin-induced toxicity (*SLCO1B1*\*5, \*15, and \*17) (**Supplemental Table S5**). However, several other variants have been reported to be associated with reduced/increased enzyme function and/or linked to statin-induced myopathy, albeit with somewhat weaker evidence (**Supplemental Table S2**). These variants have been categorized as “possible decreased function” or “possible increased function” based on weak *in vitro* evidence suggesting the variant results in decreased/increased function but lack evidence linking these genotypes to statin-induced myopathy or as “unknown/unclear/contradictory” based on conflicting evidence.

### **Available Genetic Test Options**

Commercially available genetic testing options change over time. Additional updated information can be found at:

[http://www.pharmgkb.org/resources/forScientificUsers/pharmacogenomic\\_tests.jsp](http://www.pharmgkb.org/resources/forScientificUsers/pharmacogenomic_tests.jsp).

Furthermore, the Genetic Testing Registry (GTR) provides a central location for voluntary submission of genetic test information by providers and is available at

<http://www.ncbi.nlm.nih.gov/gtr/>. At the time of writing, there is one *SLCO1B1* genetic test listed in the GTR (<http://www.ncbi.nlm.nih.gov/gtr/tests/509024/>).

### **Levels of Evidence**

The evidence summarized in **Supplemental Table S5** is graded using a scale based on previously published criteria (1) and applied to other CPIC guidelines(2-4):

- **High:** Evidence includes consistent results from well-designed, well-conducted studies.

- **Moderate:** Evidence is sufficient to determine effects, but the strength of the evidence is limited by the number, quality, or consistency of the individual studies; generalizability to routine practice; or indirect nature of the evidence.
- **Weak:** Evidence is insufficient to assess the effects on health outcomes because of limited number or power of studies, important flaws in their design or conduct, gaps in the chain of evidence, or lack of information.

Every effort was made to present evidence from high-quality studies, which provided the framework for the strength of therapeutic recommendations.

### **Strength of Recommendations**

CPIC’s dosing recommendations weigh the evidence from a combination of preclinical and clinical data. Some of the factors that are taken into account include *in vivo* clinical outcome data for statins, *in vivo* pharmacodynamic data for statins, and *in vivo* pharmacokinetic data for statins in individuals who vary by *SLCO1B1* genotype. We also consider *in vitro* pharmacodynamic and pharmacokinetic data for statins.

Overall, the therapeutic recommendations are simplified to allow rapid interpretation by clinicians. CPIC uses a slight modification of a transparent and simple system for just three categories for recommendations adopted from the rating scale for evidence-based recommendations on the use of retroviral agents

(<http://aidsinfo.nih.gov/contentfiles/AdultandAdolescentGL.pdf>): ‘strong’, where “the evidence is high quality and the desirable effects clearly outweigh the undesirable effects”; ‘moderate’, in which “there is a close or uncertain balance” as to whether the evidence is high quality and the desirable clearly outweigh the undesirable effects; and ‘optional’, in which the desirable effects are closely balanced with undesirable effects and there is room for differences in opinion as to the need for the recommended course of action (2, 5).

‘Strong’ recommendation for the statement

‘Moderate’ recommendation for the statement

‘Optional’ recommendation for the statement

### **Incidental findings**

Hepatic uptake of unconjugated bilirubin is mediated by *SLCO1B1* (6). Variation in *SLCO1B1* has been shown to alter total serum bilirubin levels (6-10) and has been associated with hyperbilirubinemia in adult Asians (11). Variants in *SLCO1B1* are also associated with increased risk for gallstone disease (rs11045819) (12), as well as hypertension (rs4149014) (13) and coronary artery disease (rs4149013) (14).

The *SLCO1B1* gene product transports many drugs and biochemicals (reviewed in details by Niemi et al, 2011). The C allele at rs4149056 is related to impaired transport of many drugs *in vitro* and *in vivo*, including for example changes in irinotecan disposition (15, 16) and clearance of the antiretroviral drug lopinavir (17). Other variants have an impact as well. For example, *SLCO1B1* rs11045819 polymorphism (c.463C>A) is associated with lower rifampin exposure in adults with pulmonary tuberculosis (18).

### **Other Considerations**

**Drug-drug interactions.** Between 1998 and 2001, more than forty cases of muscle toxicity associated with the use of cerivastatin were found to be fatal. Many of these occurred within the context of gemfibrozil, a drug that strongly inhibits the cytochrome P450 (CYP) 2C8-catalyzed biotransformation of cerivastatin and also inhibits membrane transport and phase II conjugation of statins (19, 20).

The biological disposition of each statin differs on a drug-by-drug basis. Some statins undergo extensive phase I oxidation (atorvastatin, fluvastatin, lovastatin, and simvastatin), others do not (pitavastatin, pravastatin, and rosuvastatin). CYP3A4 inhibitors (e.g., azole antifungals, protease inhibitors, amiodarone, and many calcium channel blockers) increase risk of myopathy for statins metabolized by CYP3A4/5 (e.g., simvastatin, lovastatin and atorvastatin) (21).

Many statins also undergo additional modification through phase II conjugation by enzymes in the UDP-glucuronosyltransferase-1 (*UGT1*) family. This process can be altered by concomitant administration of fibric acids (22). Gemfibrozil, a fibric acid derivative, alters pharmacokinetic handling of a variety of statins. By inhibiting the glucuronidation and membrane transport of

simvastatin hydroxy-acids, gemfibrozil increases systemic exposure to active simvastatin acid (23) placing patients at increased risk for developing myopathy. Because of interactions such as these, the simvastatin package label update also recommends reducing the dose of simvastatin in patients using concomitant medications known to alter its pharmacokinetics (details in Supplemental Table 1).

***The Role of Ancestry.*** Our guideline reflects recent recommendations from the U.S. FDA regarding the strong dose-dependence of muscle toxicity for simvastatin. For other statins, the FDA has recommended limiting the dose based upon major continental race (FDA Public Health Advisory on rosuvastatin; Media release March 2, 2005). For rosuvastatin, specifically, the FDA recommends limiting patients of Asian ancestry to a 5 mg starting dose, based upon two clinical observations: first, that patients of Asian ancestry exhibit a 2-fold increase in AUC for rosuvastatin, compared to patients of European ancestry, following single dose exposure (24) and second, that patients of Asian ancestry have greater lipid lowering efficacy at lower doses of rosuvastatin, compared to patients of European ancestry (24). As a result, the FDA has concluded that Asian Americans are one of three important groups with an elevated risk/benefit ratio (the others were patients on cyclosporine (CSA)/immune suppression and patients with severe kidney failure) (25-31).

Geographic differences in allele frequency for rs4149056 in *SLCO1B1* do not appear to contribute to this race discrepancy (24). For rosuvastatin, this difference appears to be at least partly attributable to variability in efflux transporters such as *ABCG2*, as well as gene-gene and gene-environment interactions not yet defined(32). For simvastatin, race-dependent differences in *SLCO1B1* variant frequency carry an undefined impact on outcome. Because there is great variability in the distribution of this variant by race (33), we present a summary in **Supplemental Table 3** and details in **Supplemental Table 4**.

***Other Limitations.*** The pharmacokinetic predictors of statin-induced myopathy are well understood (23, 34-50). Pharmacodynamic predictors have been less well characterized. Although the cellular mechanism linking statins to skeletal muscle damage still remains somewhat obscured, the weight of the evidence suggests that statin-mediated reduction in the



levels of critical cholesterol precursors (i.e., isoprenoids) can lead to mitochondrial dysfunction, and programmed cell death (51-54). While inherited variability in the prenylation of key mitochondrial oxygen transport proteins may drive a subclinical form of myopathy that becomes overtly manifest after exposure to statin, there is only limited evidence supporting the clinical utility of genotyping pharmacodynamic variants.

Genotype at rs4149056 (PK variability) may also alter the desired lipid-lowering effects of statins (55, 56). Because rs4149056 influences hepatic uptake of statins, the minor allele has opposite effects on toxicity and efficacy; i.e., the presence of the minor allele attenuates the LDL-lowering effect (because the liver is the primary site for *de novo* cholesterol biosynthesis). Carriers of the rs4149056 C allele are more likely to experience decreased efficacy with regard to LDL-lowering when taking simvastatin (35, 57-59) compared to other statins such as atorvastatin (60) or fluvastatin (61). As anticipated from the kinetic data, the effect of rs4149056 on efficacy is minimal for pravastatin (62-64), rosuvastatin (65, 66), and pitavastatin (67-71). Even for simvastatin, however, the change in LDL level due to rs4149056 is small (<10 mg/dl) (35), and there is no evidence that this variant impacts vascular events. As such, we do not make recommendations based upon the relationship between rs4149056 and efficacy.

We also do not make recommendations based upon gain of function alleles (72). Because rs4149056 can be inherited in combination with other *SLCO1B1* variants that carry a protective effect, the C allele at rs4149056 should not be assumed to confer risk with 100% certainty. Like all drug-gene-outcome relationships reviewed by CPIC, it is anticipated that these guidelines will be updated as more variants (both common and rare) are increasingly characterized, e.g., through deep re-sequencing.

In the interim, a clear limitation is that rare and *de novo* variants are often not tested for within currently available genotyping tests, if discovered, it may be unclear how to act upon such results. Yet, rare exonic variants in *SLCO1B1* have been shown to have clinical impact (e.g., methotrexate clearance) (73). Therefore, altered drug kinetics and increased risk for severe drug toxicity may still occur in the absence of a C allele at rs4149056, and a TT genotype at rs4149056 does not imply the absence of another potentially deleterious variant in *SLCO1B1*.

## **Resources to Incorporate Pharmacogenetics into an EHR with CDS**

Use of clinical decision support (CDS) tools within electronic health records (EHRs) can assist clinicians to use genetic information to optimize drug therapy (74-78). Supplementary material provides new resources from CPIC to support the adoption of CPIC guidelines within an EHR. Based on the capabilities of various EHRs and local preferences, we recognize approaches may vary across organizations. Our intent is to synthesize foundational knowledge that provides a common starting point for incorporating the use of *SLCO1B1* genotype results to guide simvastatin dosing in any EHR.

Effectively incorporating pharmacogenetic information into an EHR to optimize drug therapy should have some key attributes. First, pharmacogenetic results, an interpreted phenotype, and a concise interpretation or summary of the result must be documented in the EHR (79). Because clinicians must be able to easily find the information, the interpreted phenotype may be documented as a problem list entry or in a patient summary section; these phenotypes are best stored in the EHR at the “person level” rather than at the date-centric “encounter level.” Second, results should be entered as standardized and discrete terms to facilitate using them to provide point of care CDS (80, 81). Because pharmacogenetic results have lifetime implications and clinical significance, results should be placed into a section of the EHR that is accessible independent of the test result date to allow clinicians to quickly find the result at any time after it is initially placed in the EHR. Point-of-care CDS should be designed to effectively remind clinicians of prescribing implications at any time after the test result is entered into the EHR. Guidance to achieve these objectives is provided in diagrams that illustrate how *SLCO1B1* pharmacogenetic test results could be entered into an EHR (**Supplemental Figure S2**) and be used for point-of-care CDS (**Supplemental Figure S3**). **Supplemental Tables S8** and **S9** provide a cross-reference to widely used nomenclature systems for the drug and the gene, respectively.

To incorporate a phenotype in the EHR in a standardized manner, genotype test results provided by the laboratory must be consistently translated into an interpreted phenotype (**Table 1, main manuscript**). **Supplemental Table S10** further translates results into a coded

diplotype/phenotype summary, priority result notification, and sample interpretative result text. The result tables provide summary genotype/phenotype terms, example text for documentation in the EHR and point-of-care alerts. Finally, sample point-of-care alert text that corresponds to the workflow described in **Supplemental Figure S3** is provided in **Supplemental Table S11**.

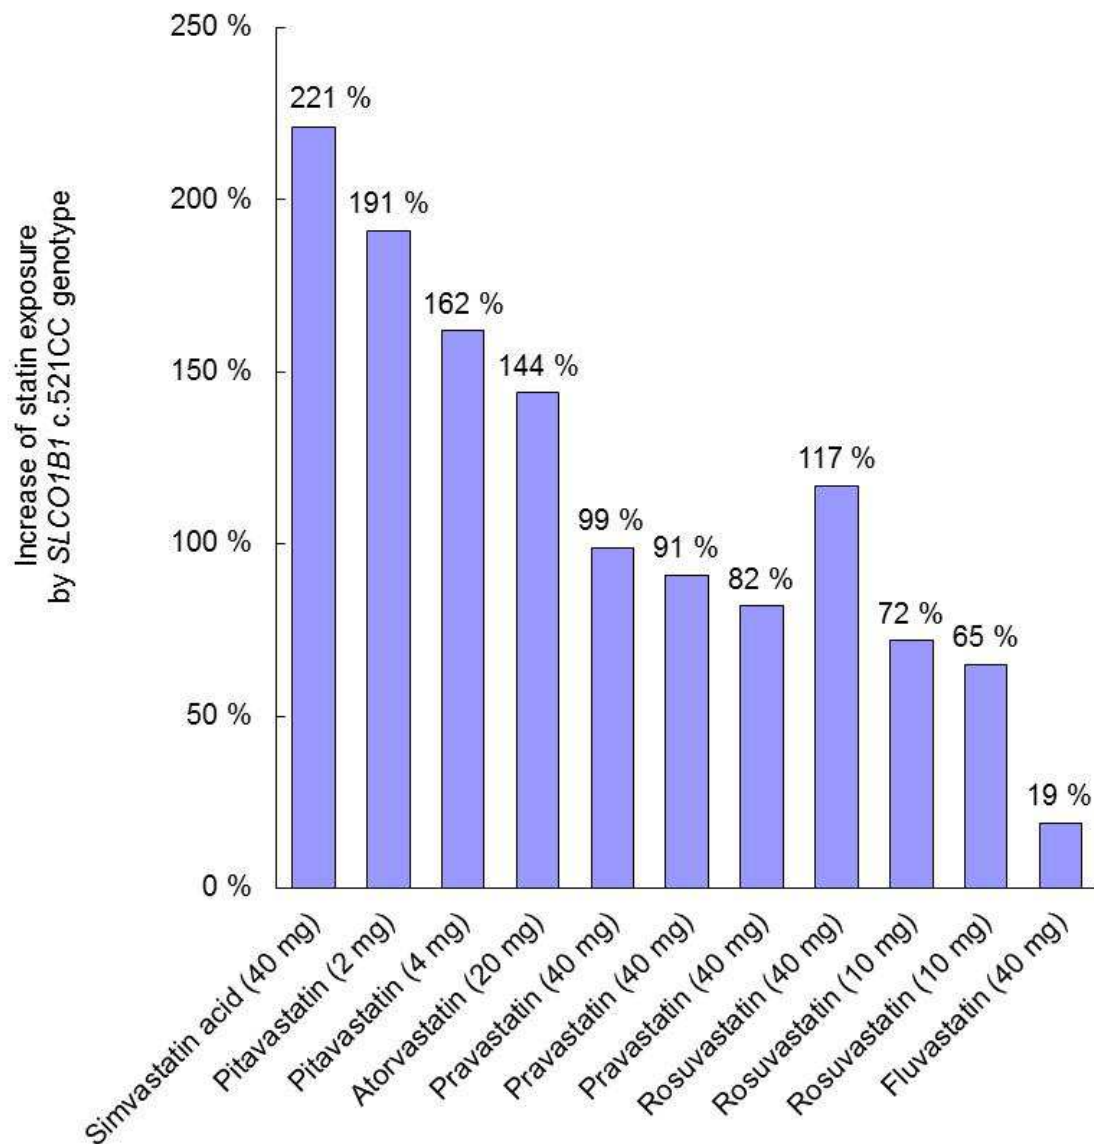

**Supplemental Figure S1. Pharmacokinetic impact of rs4149056 genotype for several**

**statins.** Effect of the *SLCO1B1* c.521T>C variant (rs4149056) on plasma exposure (*i.e.* area under the concentration-time curve) for different statins, CC vs TT. This summary figure represents a composite of single-dose data from the following references: Pasanen *et al* (82), Ieiri *et al* (70), Lee *et al.* (83), Niemi *et al* (84), Pasanen *et al* (85), Choi *et al* (86), Deng *et al* (69), Ho *et al* (87).

Portions of this figure have been reproduced from reference (88) (Niemi *et al*) with permission from the author (MN), the publisher, the American Society for Pharmacology and Experimental Therapeutics (ASPET), and *Pharmacological Reviews*.

**Supplemental Table S1. Genotypes that constitute the \* alleles for *SLCO1B1*.**

| <b>Allele</b> | <b>Constituted by genotypes at:</b>                                                                                                                                                                                                     |
|---------------|-----------------------------------------------------------------------------------------------------------------------------------------------------------------------------------------------------------------------------------------|
| *1A           | Wild-type at all loci                                                                                                                                                                                                                   |
| *1B           | rs2306283 G allele (A ancestral) (c.388A>G, p.N130D)                                                                                                                                                                                    |
| *2            | rs56101265 C allele (T ancestral) (c.217T>C, p.F73L)                                                                                                                                                                                    |
| *3            | rs56061388 C allele (T ancestral) (c.245T>C, p.V82A); rs72559745 (c.467A>G, p.Q156G)                                                                                                                                                    |
| *4            | rs11045819 A allele (C ancestral) (c.463C>A, p.P155T)                                                                                                                                                                                   |
| *5            | rs4149056 C allele (T ancestral) (c.521T>C, p.V174A)                                                                                                                                                                                    |
| *6            | rs55901008 C allele (T ancestral) (c.1058T>C, p.I353T)                                                                                                                                                                                  |
| *7            | rs56387224 G allele (A ancestral) (c.1294A>G, p.N432D)                                                                                                                                                                                  |
| *8            | rs72559748 G allele (A ancestral) (c.1385A>G, p.D462G)                                                                                                                                                                                  |
| *9            | rs59502379 C allele (G ancestral) (c.1463G>C, p.G488A)                                                                                                                                                                                  |
| *10           | rs56199088 G allele (A ancestral) (c.1964A>G, p.D655G)                                                                                                                                                                                  |
| *11           | rs55737008 G allele (A ancestral) (c.2000A>G, p.E667G)                                                                                                                                                                                  |
| *12           | rs56101265 C allele (T ancestral); rs56199088 G allele (A ancestral)                                                                                                                                                                    |
| *13           | rs56061388 C allele (T ancestral); rs55737008 G allele (A ancestral); rs72559745 G allele (A ancestral)                                                                                                                                 |
| *14           | rs2306283 G allele (A ancestral); rs11045819 A allele (C ancestral)                                                                                                                                                                     |
| *15           | rs2306283 G allele (A ancestral); rs4149056 C allele (T ancestral)                                                                                                                                                                      |
| *16           | rs2306282 G allele (A ancestral) (c.452A>G, p.N151S)                                                                                                                                                                                    |
| *17           | rs4149015 A allele (G ancestral; g.-11187G>A); rs2306283 G allele (A ancestral); rs4149056 C allele (T ancestral)                                                                                                                       |
| *18           | rs2306283 G allele (A ancestral); rs11045818 A allele (G ancestral) (c.411G>A, p.S137=); rs11045819 A allele (C ancestral); rs4149057 C allele (T ancestral) (c.571T>C, p.L191=); rs72559746 G allele (T ancestral) (c.578T>G, p.L193R) |
| *19           | rs4149057 C allele (T ancestral); rs34671512 C allele (A ancestral) (c.1929A>C, p.L643F)                                                                                                                                                |
| *20           | rs2306283 G allele (A ancestral); rs2291075 T allele (C ancestral) (c.597C>T, p.F199=); rs34671512 C allele (A ancestral)                                                                                                               |
| *21           | rs4149015 A allele (G ancestral); rs2306283 G allele (A ancestral); rs2291075 T allele (C ancestral)                                                                                                                                    |
| *22           | rs34671512 C allele (A ancestral)                                                                                                                                                                                                       |
| *23           | rs373327528 A allele (G ancestral) (c.315G>A, p.G71R)                                                                                                                                                                                   |
| *24           | rs2306283 G allele (A ancestral); rs11045852 G allele (A ancestral) (c.733A>G, p.I245V)                                                                                                                                                 |
| *25           | rs2306283 G allele (A ancestral); rs11045819 A allele (C ancestral); rs11045852 G allele (A ancestral) (c.733A>G, p.I245V); rs11045853 A allele (G ancestral) (c.758G>A, p.R253G)                                                       |
| *26           | rs142965323 A allele (G ancestral) (c.1309G>A, p.G437R)                                                                                                                                                                                 |
| *27           | rs2306283 G allele (A ancestral); rs59113707 G allele (C ancestral) (c.1200C>G, p.F400L)                                                                                                                                                |

|     |                                                                                                                                                               |
|-----|---------------------------------------------------------------------------------------------------------------------------------------------------------------|
| *28 | rs2306283 G allele (A ancestral); rs11045852 G allele (A ancestral) (c.733A>G, p.I245V); rs11045853 A allele (G ancestral)                                    |
| *29 | rs2306283 G allele (A ancestral); rs140790673 T allele (C ancestral) (c.2045C>T, p.S682F)                                                                     |
| *30 | rs2306283 G allele (A ancestral); rs79135870 G allele (A ancestral) (c.664A>G, p.I222V)                                                                       |
| *31 | rs2306283 G allele (A ancestral); rs59502379 C allele (G ancestral)                                                                                           |
| *32 | rs2306283 G allele (A ancestral); rs11045819 A allele (C ancestral); rs11045852 G allele (A ancestral)                                                        |
| *33 | rs139257324 G allele (C ancestral) (c.169C>T, p.R57W); rs2306283 G allele (A ancestral); rs11045852 G allele (A ancestral); rs11045853 A allele (G ancestral) |
| *34 | rs200995543 T allele (C ancestral) (c.2032C>T, p.H678Y)                                                                                                       |
| *35 | rs2306283 G allele (A ancestral); rs34671512 C allele (A ancestral)                                                                                           |
| *36 | chr12:21355487(hg19) G allele (T ancestral) (c.1198T>G, p.F400V)                                                                                              |

See <http://www.pharmgkb.org/gene/PA134865839#tabview=tab4&subtab=31> for updates on *SLCO1B1* alleles and nomenclature. Bases reported on the positive chromosomal strand.

**Supplemental Table S2. Association between allelic variants and SLCO1B1 (OATP1B1) function**

| Functional Status                      | Alleles                                                                                                           | References                                                                                                                                                                                                                                         |
|----------------------------------------|-------------------------------------------------------------------------------------------------------------------|----------------------------------------------------------------------------------------------------------------------------------------------------------------------------------------------------------------------------------------------------|
| Normal function <sup>a</sup>           | *1a, *1b                                                                                                          | Mwinyi <i>et al.</i> (2004) (89)<br>Kameyama <i>et al.</i> (2005)(90)<br>Lee <i>et al.</i> (2005) (83)<br>Katz <i>et al.</i> (2006) (91)<br>Tirona <i>et al.</i> (2011) (92)                                                                       |
| Decreased function                     | *5, *15, *17                                                                                                      | See Supplemental Table S5                                                                                                                                                                                                                          |
| Possible decreased function            | *2, *3, *6, *9, *10, *23, *31                                                                                     | Tirona <i>et al.</i> (2001)(92)<br>Tirona <i>et al.</i> (2003) (93)<br>Ho <i>et al.</i> (2006) (8)<br>Katz <i>et al.</i> (2006) (91)<br>Niemi <i>et al.</i> (2011)(88)<br>Ramsey <i>et al.</i> (2012) (94) <sup>b</sup>                            |
| Possible increased function            | *14, *35                                                                                                          | Ramsey <i>et al.</i> (2012) (94) <sup>b</sup><br>Nies <i>et al.</i> (2013) (95)                                                                                                                                                                    |
| Unknown/unclear/contradictory evidence | *4, *7, *8, *11, *12, *13, *16, *18, *19, *20, *21, *22,<br>*24, *25, *26, *27, *28, *29, *30, *32, *33, *34, *36 | Tirona <i>et al.</i> (2001)(92)<br>Michalski <i>et al.</i> (2002) (96)<br>Tirona <i>et al.</i> (2003) (93)<br>Ho <i>et al.</i> (2006) (8)<br>Katz <i>et al.</i> (2006) (91)<br>Seithel <i>et al.</i> (2008) (97)<br>Niemi <i>et al.</i> (2011)(88) |

<sup>a</sup>An important caveat for all genotyping tests is that the decision to assign an allele a “wild-type” status is based upon a genotyping test that interrogates only the most common and already-proven sites of functional variation. In human DNA, it is always possible that a new, previously undiscovered (and therefore un-interrogated) site of variation may confer loss-of-function in an individual, and thus lead to the rare possibility of a non-functional allele being erroneously called as “wild-type”

<sup>b</sup>Transport function was tested for methotrexate, and may not be generalizable to statins. \*23 was observed only once in 700 patients, but in vitro transport assays showed little/no function. \*31 was observed only in patients of African ancestry, and in vitro transport assays showed little/no function for this haplotype also. \*14 and \*35 were associated with higher methotrexate clearance in patients, but were not tested for in vitro transport function.



**Supplemental Table S3. Observed frequencies for select *SLCO1B1* alleles<sup>a</sup> within major race/ethnic or geographic groups.**

| Allele | Functional Status                 | Caucasian | South/Central American | African | Middle Eastern | Asian | SW Asian | Oceania |
|--------|-----------------------------------|-----------|------------------------|---------|----------------|-------|----------|---------|
| *1A    | normal/<br>wild type <sup>b</sup> | 50%       | 37%                    | 17%     | 49%            | 27%   | 47%      | 34%     |
| *1B    | normal/<br>wild type <sup>b</sup> | 22%       | 39%                    | 78%     | 31%            | 60%   | 46%      | 66%     |
| *5     | variant/<br>reduced<br>function   | 1%        | 0%                     | 0%      | 5%             | 0%    | 0%       | 0%      |
| *15    | variant/<br>reduced<br>function   | 14%       | 24%                    | 3%      | 15%            | 13%   | 6%       | 0%      |

<sup>a</sup>Average allele frequencies are presented based upon the actual numbers of subjects with each allele reported in multiple studies, and grouped according to major race/ethnic or geographic groups (see Supplemental Table 4 for references and constitution of the race/ethnic/geographic groups ).

<sup>b</sup>An important caveat for all genotyping tests is that the decision to assign “wild-type” status is based upon a genotyping test that interrogates only the most common and already-proven sites of functional variation. In human DNA, it is always possible that new, previously undiscovered (and therefore un-interrogated) site of variation may confer loss-of-function in an individual, and thus lead to the rare possibility of a non-functional allele being erroneously called as “wild-type.”

**Supplemental Table S4. Detailed distribution of *SLCO1B1* allele frequency by race, ethnicity, or geographic groups.**

| Race/ethnic/geographic groups group | Race/ethnicity/geographic location as reported in source document | Haplotype frequency (%) |     |    |             | Total pts | alleles observed |     |    |             |       | Total alleles | Source |
|-------------------------------------|-------------------------------------------------------------------|-------------------------|-----|----|-------------|-----------|------------------|-----|----|-------------|-------|---------------|--------|
|                                     |                                                                   | *1A                     | *1B | *5 | *15/*16/*17 |           | *1A              | *1B | *5 | *15/*16/*17 | other |               |        |
| African                             | American                                                          | 22%                     | 76% | 0% | 1%          | 38        | 17               | 58  | 0  | 1           | 0     | 76            | (87)   |
| African                             | North African                                                     | 34%                     | 48% | 2% | 16%         | 29        | 20               | 28  | 1  | 9           | 0     | 58            | (33)   |
| African                             | Sub-Saharan Africa                                                | 21%                     | 77% | 0% | 2%          | 105       | 44               | 162 | 0  | 4           | 0     | 210           | (33)   |
| African                             | Ugandan                                                           | 22%                     | 70% | 0% | 3%          | 109       | 48               | 153 | 0  | 7           | 10    | 218           | (98)   |
| African                             | Tanzanian                                                         | 13%                     | 84% | 0% | 3%          | 366       | 97               | 614 | 0  | 21          | 0     | 732           | (99)   |
| Asian                               | Japanese                                                          | 35%                     | 54% | 1% | 10%         | 267       | 188              | 287 | 4  | 55          | 0     | 534           | (100)  |
| Asian                               | Japanese                                                          | 33%                     | 46% | 0% | 18%         | 120       | 78               | 110 | 0  | 44          | 8     | 240           | (101)  |
| Asian                               | Malays                                                            | 17%                     | 70% | 0% | 13%         | 35        | 12               | 49  | 0  | 9           | 0     | 70            | (83)   |
| Asian                               | Korean                                                            | 31%                     | 46% | 0% | 23%         | 24        | 15               | 22  | 0  | 11          | 0     | 48            | (102)  |
| Asian                               | Chinese                                                           | 19%                     | 71% | 0% | 11%         | 94        | 35               | 133 | 0  | 20          | 0     | 188           | (103)  |
| Asian                               | Malays                                                            | 12%                     | 79% | 0% | 9%          | 97        | 23               | 153 | 0  | 18          | 0     | 194           | (103)  |
| Asian                               | Korean                                                            | 29%                     | 60% | 0% | 12%         | 200       | 115              | 238 | 0  | 47          | 0     | 400           | (86)   |
| Asian                               | Korean                                                            | 18%                     | 62% | 0% | 18%         | 81        | 29               | 101 | 0  | 29          | 3     | 162           | (15)   |
| Asian                               | Chinese                                                           | 26%                     | 60% | 0% | 14%         | 111       | 58               | 133 | 0  | 31          | 0     | 222           | (104)  |
| Asian                               | Chinese                                                           | 22%                     | 69% | 1% | 8%          | 106       | 46               | 146 | 3  | 17          | 0     | 212           | (105)  |
| Asian                               | Korean                                                            | 26%                     | 60% | 0% | 14%         | 469       | 247              | 560 | 0  | 131         | 0     | 938           | (105)  |
| Asian                               | Vietnamese                                                        | 21%                     | 63% | 0% | 16%         | 104       | 44               | 130 | 0  | 34          | 0     | 208           | (105)  |
| Asian                               | East Asian                                                        | 25%                     | 63% | 0% | 12%         | 239       | 120              | 301 | 0  | 57          | 0     | 478           | (33)   |
| Asian                               | Japanese                                                          | 36%                     | 47% | 0% | 17%         | 177       | 128              | 166 | 0  | 60          | 0     | 354           | (106)  |
| Asian                               | Japanese                                                          | 33%                     | 49% | 0% | 18%         | 80        | 52               | 79  | 0  | 29          | 0     | 160           | (107)  |
| Asian                               | Chinese                                                           | 25%                     | 64% | 0% | 12%         | 96        | 47               | 122 | 0  | 23          | 0     | 192           | (108)  |
| Asian                               | Malays                                                            | 19%                     | 71% | 0% | 9%          | 96        | 37               | 137 | 0  | 18          | 0     | 192           | (108)  |
| Asian                               | Chinese                                                           | 30%                     | 59% | 0% | 11%         | 32        | 19               | 38  | 0  | 7           | 0     | 64            | (109)  |
| Asian                               | Chinese                                                           | 33%                     | 59% | 0% | 9%          | 35        | 23               | 41  | 0  | 6           | 0     | 70            | (83)   |
| Caucasian                           |                                                                   | 47%                     | 31% | 1% | 21%         | 36        | 34               | 22  | 1  | 15          | 0     | 72            | (83)   |
| Caucasian                           | German                                                            | 49%                     | 33% | 1% | 11%         | 250       | 245              | 165 | 5  | 55          | 30    | 500           | (110)  |
| Caucasian                           | Finnish                                                           | 11%                     | 2%  | 3% | 17%         | 468       | 100              | 21  | 25 | 161         | 629   | 936           | (111)  |

|                        |                     |     |     |    |     |      |      |      |    |     |    |      |       |
|------------------------|---------------------|-----|-----|----|-----|------|------|------|----|-----|----|------|-------|
| Caucasian              | American            | 61% | 25% | 1% | 14% | 69   | 84   | 34   | 1  | 19  | 0  | 138  | (87)  |
| Caucasian              | German              | 58% | 25% | 3% | 15% | 99   | 114  | 49   | 5  | 30  | 0  | 198  | (112) |
| Caucasian              | European            | 56% | 26% | 2% | 16% | 151  | 169  | 79   | 6  | 48  | 0  | 302  | (33)  |
| Caucasian              | German              | 60% | 9%  | 3% | 12% | 276  | 333  | 48   | 17 | 66  | 88 | 552  | (98)  |
| Caucasian              | Turkish             | 52% | 22% | 1% | 9%  | 78   | 82   | 34   | 2  | 15  | 24 | 156  | (98)  |
| Caucasian              | French              | 53% | 14% | 2% | 15% | 185  | 196  | 52   | 8  | 56  | 58 | 370  | (113) |
| Caucasian              | Dutch               | 57% | 27% | 1% | 15% | 1885 | 2148 | 1022 | 27 | 572 | 0  | 3770 | (114) |
| Caucasian              | Canadian            | 50% | 5%  | 0% | 18% | 41   | 41   | 4    | 0  | 15  | 22 | 82   | (115) |
| Caucasian              | German              | 56% | 35% | 3% | 7%  | 236  | 263  | 163  | 12 | 34  | 0  | 472  | (99)  |
| Middle East            |                     | 49% | 31% | 5% | 15% | 133  | 130  | 83   | 13 | 40  | 0  | 266  | (33)  |
| Oceanic                |                     | 34% | 66% | 0% | 0%  | 28   | 19   | 37   | 0  | 0   | 0  | 56   | (33)  |
| South/Central American |                     | 37% | 39% | 0% | 24% | 64   | 47   | 50   | 0  | 31  | 0  | 128  | (33)  |
| SW Asian               | Indian              | 46% | 47% | 0% | 7%  | 35   | 32   | 33   | 0  | 5   | 0  | 70   | (83)  |
| SW Asian               | Indian              | 41% | 56% | 2% | 2%  | 93   | 76   | 104  | 3  | 3   | 0  | 186  | (103) |
| SW Asian               | South/Central Asian | 52% | 39% | 0% | 9%  | 192  | 200  | 150  | 0  | 34  | 0  | 384  | (33)  |
| SW Asian               | Indian              | 44% | 50% | 0% | 6%  | 96   | 85   | 96   | 0  | 11  | 0  | 192  | (108) |

**Supplemental Table S5. Evidence linking genotype with phenotype**

| Type of experimental model (in vitro, in vivo preclinical, or clinical)             | Major findings                                                                                                                                                                                                                                          | References                                                            | Level of evidence* |
|-------------------------------------------------------------------------------------|---------------------------------------------------------------------------------------------------------------------------------------------------------------------------------------------------------------------------------------------------------|-----------------------------------------------------------------------|--------------------|
| <b>Association of <i>SLCO1B1</i> genotype with simvastatin disposition in vitro</b> |                                                                                                                                                                                                                                                         |                                                                       |                    |
| In vitro                                                                            | rs4149056 is the key SNP determining the functional properties of <i>SLCO1B1</i> *5, *15 and *15+C1007G allelic proteins and that decreased activities of these variant proteins are mainly caused by a sorting error produced by this SNP.             | Kameyama <i>et al.</i> (2005) (116)                                   | Low                |
| In vitro                                                                            | Comparable transport of rosuvastatin between OATP1B1*1a and *1b, but significantly decreased transport by OATP1B1*5 and OATP1B1*15 in HeLa cells.                                                                                                       | Ho <i>et al.</i> (2006) (8)                                           | Low                |
| In vitro                                                                            | Reduced transport function for OATP1B1*15 as compared with *1a. Similar transport activity was found for OATP1B1*1a and *1b in HEK293 cells.                                                                                                            | Iwai <i>et al.</i> (2004) (117)                                       | Low                |
| In vitro                                                                            | Similar transport activity was found for OATP1B1*1a and *1b using E1S as substrate in HEK293 cells. No reduced activity seen for *5.                                                                                                                    | Nozawa <i>et al.</i> (2002) (100)                                     | Low                |
| <b>Association of <i>SLCO1B1</i> genotype with myalgia or myopathy</b>              |                                                                                                                                                                                                                                                         |                                                                       |                    |
| Clinical                                                                            | <i>SLCO1B1</i> rs4149056 C allele carriage is strongly associated with an increased risk of <b>simvastatin</b> -induced myopathy.                                                                                                                       | Link <i>et al.</i> (2008) (118)<br>Brunham <i>et al.</i> (2011) (119) | High               |
| Clinical                                                                            | Presence of the <i>SLCO1B1</i> *5 (rs4149056 C) allele is associated with increased risk of composite adverse events when treated with statins ( <b>atorvastatin</b> , <b>pravastatin</b> or <b>simvastatin</b> ) in patients with hypercholesterolemia | Voora <i>et al.</i> (2009) (120)<br>Carr <i>et al.</i> (2013) (121)   | High               |

|                                                                                    |                                                                                                                                                                                                                                                                                                                                                               |                                                                                                            |          |
|------------------------------------------------------------------------------------|---------------------------------------------------------------------------------------------------------------------------------------------------------------------------------------------------------------------------------------------------------------------------------------------------------------------------------------------------------------|------------------------------------------------------------------------------------------------------------|----------|
| Clinical                                                                           | No increased risk of myalgia identified among patients receiving <b>rosuvastatin</b> who carried either rs4363657C or rs4149056C allele for <i>SLCO1B1</i>                                                                                                                                                                                                    | Danik <i>et al.</i> (2013) (122)                                                                           | Moderate |
| Clinical                                                                           | <i>SLCO1B1</i> rs4149056 genotype influences susceptibility to myopathy in response to <b>simvastatin</b> but not <b>atorvastatin</b> .                                                                                                                                                                                                                       | Brunham <i>et al.</i> (2012)(123)                                                                          | Low      |
| Clinical                                                                           | <i>SLCO1B1</i> haplotypes are not associated with <b>atorvastatin</b> -induced myalgia                                                                                                                                                                                                                                                                        | Santos <i>et al.</i> (2012)(124)                                                                           | Low      |
| Clinical                                                                           | There was no association between the C allele of rs4149056 and myopathy in <b>rosuvastatin</b> -treated subjects (O.R. 0.65, 95% C.I. 0.24–1.01, beta-coefficient 0.29, p = 0.099) but there was an association between the rs4149056 C allele and myopathy for atorvastatin-treated subjects (O.R. 2.7, 95% C.I. 1.3–4.9, beta-coefficient 1.56, p < 0.001). | Puccetti <i>et al.</i> (2010) (125)                                                                        | Low      |
| <b>Association of <i>SLCO1B1</i> genotype with pharmacokinetics of simvastatin</b> |                                                                                                                                                                                                                                                                                                                                                               |                                                                                                            |          |
| Preclinical, in vivo                                                               | There were no significant effects on <b>simvastatin</b> pharmacokinetics in healthy Chinese volunteers by SNPs in <i>SLCO1B1</i> c.388 A > G, <i>SLCO1B1</i> c.521 T > C, <i>SLCO1B1</i> g.11187 G > A, <i>SLCO1B1</i> c.571 T > C and <i>SLCO1B1</i> c.597 C > T.                                                                                            | Zhou <i>et al.</i> (2013) (126)                                                                            | Moderate |
| Preclinical, in vivo                                                               | <i>SLCO1B1</i> rs4149056C polymorphism markedly affects the pharmacokinetics of active <b>simvastatin</b> acid, but has no significant effect on parent simvastatin.                                                                                                                                                                                          | Pasanen <i>et al.</i> (2006) (82)                                                                          | Moderate |
| <b>Association of <i>SLCO1B1</i> genotype with lipid-lowering effects</b>          |                                                                                                                                                                                                                                                                                                                                                               |                                                                                                            |          |
| Clinical                                                                           | <i>SLCO1B1</i> variant alleles (rs4149056, rs11045819) and other gene variants involved in statin pharmacokinetics had small effects (<1% per allele) on lipid-lowering response to statin therapy.                                                                                                                                                           | Fu <i>et al.</i> (2013) (127)<br>Hopewell <i>et al.</i> (2013) (128)                                       | High     |
| Clinical                                                                           | SNPs in <i>SLCO1B1</i> (rs4149056; rs436365; rs12317268) were associated with reduced LDL-C in patients receiving <b>rosuvastatin</b> .                                                                                                                                                                                                                       | Chasman <i>et al.</i> (2012) (129)                                                                         | Moderate |
| Clinical                                                                           | The <i>SLCO1B1</i> rs4149056C variant allele significantly decreased LDL-C and TC lowering response to <b>pravastatin</b> .                                                                                                                                                                                                                                   | Akao <i>et al.</i> (2012) (130)<br>Takane <i>et al.</i> (2006) (131)<br>Zhang W <i>et al.</i> (2007) (132) | High     |

|          |                                                                                                                                                                                                                                                                                  |                                             |          |
|----------|----------------------------------------------------------------------------------------------------------------------------------------------------------------------------------------------------------------------------------------------------------------------------------|---------------------------------------------|----------|
| Clinical | <i>SLCO1B1</i> rs4149056C genotype was not associated with <b>rosuvastatin</b> response as measured by frequency of patients reaching LDL-C target.                                                                                                                              | Bailey <i>et al.</i> (2010) (65)            | Moderate |
| Clinical | <i>SLCO1B1</i> SNPs rs2306283 and rs4149056C did not affect the lipid-lowering efficacy of <b>pitavastatin</b> .                                                                                                                                                                 | Yang <i>et al.</i> (2010) (68)              | Moderate |
| Clinical | Presence of the <i>SLCO1B1</i> *14 allele was associated with enhanced lipid-lowering efficacy for <b>fluvastatin</b> .                                                                                                                                                          | Couvert <i>et al.</i> (2009) (61)           | Moderate |
| Clinical | Patients receiving <b>pravastatin</b> , <b>atorvastatin</b> , and <b>simvastatin</b> who carried the rs4149056C allele showed an attenuated total-cholesterol-lowering effect compared with those homozygous for the rs4149056C allele (-22.3+/-8.7% vs. -16.5+/-10.5%, p<0.05). | Tachibana-Iimori <i>et al.</i> (2004) (133) | Moderate |
| Clinical | rs4149056 CC genotype is associated with increased cholesterol synthesis rate when exposed to <b>atorvastatin</b> , <b>fluvastatin</b> , <b>pravastatin</b> , <b>rosuvastatin</b> and <b>simvastatin</b> as compared to rs4149056 TT genotype.                                   | Pasanen <i>et al.</i> (2008) (134)          | Moderate |

**Supplemental Table S6. Impact of rs4149056 (V174A) on the pharmacokinetics of various statins**

| Study                                | Patients                                                                                             | Treatment                                      | Primary Endpoint(s)                                                                                                                                                                                                                                                                    | Additional Finding(s)                                                                                                                                                                                                                          |
|--------------------------------------|------------------------------------------------------------------------------------------------------|------------------------------------------------|----------------------------------------------------------------------------------------------------------------------------------------------------------------------------------------------------------------------------------------------------------------------------------------|------------------------------------------------------------------------------------------------------------------------------------------------------------------------------------------------------------------------------------------------|
| Nishizato <i>et al.</i> (2003) (101) | N=23 healthy Japanese volunteers                                                                     | Pravastatin 10 mg                              | Patients with the compound N130D + V174A variant had reduced total and non-renal pravastatin clearance, as compared with patients with the N130D variant.                                                                                                                              | OATP-C single-nucleotide polymorphisms, including V174A, are likely associated with altered pravastatin pharmacokinetics (PK).                                                                                                                 |
| Mwinyi <i>et al.</i> (2004) (43)     | N=30 healthy white males                                                                             | Pravastatin 40 mg                              | Pravastatin AUC and C <sub>max</sub> increased for V174A carriers compared to WT or N130D carriers.                                                                                                                                                                                    | OATP-C variant haplotypes alter pravastatin disposition. Whereas V174A expression delayed hepatocellular uptake of pravastatin, N130D expression seemed to accelerate OATP-C-dependent uptake of the drug.                                     |
| Niemi <i>et al.</i> (2004) (44)      | N=41 healthy Finnish volunteers                                                                      | Pravastatin 40 mg                              | Pravastatin AUC increased with V174A and -11187G>A variant alleles compared to WT.                                                                                                                                                                                                     | Carriers of the compound N130D + V174A variants, as well as carriers of the compound N130D + V174A + -1187G>A, also had higher pravastatin AUC compared with WT.                                                                               |
| Chung <i>et al.</i> (2005) (102)     | N=24 healthy Korean volunteers                                                                       | Pitavastatin 1-8 mg                            | Pitavastatin AUC and C <sub>max</sub> increased for carriers of the compound N130D + V174A variant versus patients with WT or N130D alleles alone.                                                                                                                                     | No significant differences were found according to genotype in terms of dose-normalized AUC or C <sub>max</sub> values of pitavastatin lactone                                                                                                 |
| Lee <i>et al.</i> (2005) (83)        | N=36 white, 36 Chinese, 35 Malay, and 35 Asian-Indian subjects living in Singapore, Singapore        | Rosuvastatin 40 mg                             | Rosuvastatin AUC's were 2.36, 2.00, and 1.68 times higher in Chinese, Malay, and Asian-Indian subjects; respectively, compared with White subjects.                                                                                                                                    | SLCO1B1 genotypes did not account for the observed PK differences between Asians and White subjects.                                                                                                                                           |
| Igel <i>et al.</i> (2006) (63)       | N=16 healthy volunteers, including 8 carriers of an SLCO1B1 variant haplotype and 8 control subjects | Pravastatin 40 mg orally daily for three weeks | Pravastatin AUC and C <sub>max</sub> were significantly higher in patients with V174A alleles compared to controls. Patients with the compound N130D + V174A variant, and patients with the triplotype -11187G>A + N130D + V174A, also had higher pravastatin AUC and C <sub>max</sub> | Despite considerably higher plasma pravastatin concentrations in carriers of an SLCO1B1 variant haplotype, there was no significant difference in the lipid-lowering efficacy of pravastatin between the variant haplotype and control groups. |

|                                      |                                                                          |                                           |                                                                                                                                                                                                                                                                                                                                      |                                                                                                                                                                                           |
|--------------------------------------|--------------------------------------------------------------------------|-------------------------------------------|--------------------------------------------------------------------------------------------------------------------------------------------------------------------------------------------------------------------------------------------------------------------------------------------------------------------------------------|-------------------------------------------------------------------------------------------------------------------------------------------------------------------------------------------|
| Niemi <i>et al.</i> (2006) (135)     | N=32 healthy Finnish volunteers                                          | Pravastatin 40 mg and fluvastatin 40 mg   | Pravastatin AUC, C <sub>max</sub> increased for men homozygous for V174A compared to men who were carriers for V174A or WT. Women who were WT had significantly higher Pravastatin AUC, C <sub>max</sub> than men who were WT. Fluvastatin PK did not differ between subjects with different SLCO1B1 genotypes or between the sexes. | SLCO1B1 polymorphism alters PK of pravastatin but not fluvastatin, which suggests that fluvastatin does not rely on OATP1B1 for hepatic uptake. Patient gender may affect pravastatin PK. |
| Pasanen <i>et al.</i> (2006) (111)   | N=4 healthy Caucasian volunteers                                         | Simvastatin 40 mg                         | Simvastatin acid AUC and C <sub>max</sub> increased for V174A carriers vs. WT                                                                                                                                                                                                                                                        | The V174A variant may increase risk for myopathy as well as reduce lipid-lowering effects due to decreased hepatic uptake.                                                                |
| Ho <i>et al.</i> (2007) (87)         | N=107 healthy volunteers (69 European-American and 38 African-Americans) | Pravastatin 40 mg                         | Pravastatin AUC, C <sub>max</sub> increased in heterozygous carriers of the compound N130D + V174A variant and in N130D + V174A homozygotes                                                                                                                                                                                          | European-Americans had significantly higher pravastatin AUC and C <sub>max</sub> than African-Americans.                                                                                  |
| Ieiri <i>et al.</i> (2007) (70)      | N=38 healthy Japanese volunteers                                         | Pitavastatin 2 mg                         | Pitavastatin AUC, C <sub>max</sub> increased for N130D or compound N130D+ V174A heterozygotes, and for compound N130D+ V174A homozygotes                                                                                                                                                                                             | Pitavastatin lactone PK were not altered by SLCO1B1 genotype.                                                                                                                             |
| Pasanen <i>et al.</i> (2007) (85)    | N=32 healthy volunteers                                                  | Atorvastatin 20 mg and rosuvastatin 10 mg | AUC and C <sub>max</sub> for atorvastatin, 2-hydroxyatorvastatin, and rosuvastatin were increased in patients with the V174A variant.                                                                                                                                                                                                | Unexpectedly, SLCO1B1 polymorphism has a larger effect on the PK of atorvastatin than rosuvastatin.                                                                                       |
| Choi <i>et al.</i> (2008) (86)       | N=30 Korean volunteers                                                   | Rosuvastatin 10 mg                        | Rosuvastatin AUC increased for compound N130D + V174A homozygotes, compound N130D + V174A carriers, and N130D carriers compared with WT. C <sub>max</sub> increased for compound N130D + V174A homozygotes compared to other groups.                                                                                                 | Rosuvastatin-lactone PK were similar among the three groups.                                                                                                                              |
| Deng <i>et al.</i> (2008) (69)       | N=11 healthy Korean volunteers                                           | Pravastatin 40 mg or Pitavastatin 4 mg    | Pitavastatin AUC and C <sub>max</sub> increased more than pravastatin for compound N130D + V174A homozygotes compared with WT                                                                                                                                                                                                        | Uptake into oocytes overexpressing the compound N130D + V174A allele was decreased for pitavastatin more so than pravastatin. Fluvastatin was unaffected.                                 |
| Suwannakul <i>et al.</i> (2008) (40) | N=10 healthy Japanese volunteers                                         | Pravastatin 10 mg (+ olmesartan 10 mg)    | Pravastatin PK not significantly affected for N130D homozygotes, versus carriers of the compound N130D + V174A variant and/or versus N130D + V174A homozygotes                                                                                                                                                                       | Co-administration of olmesartan + pravastatin did not affect PK based on SLCO1B1 genotype.                                                                                                |



|                                      |                                                      |                                          |                                                                                                                                                                                                                                                                                                           |                                                                                                                                              |
|--------------------------------------|------------------------------------------------------|------------------------------------------|-----------------------------------------------------------------------------------------------------------------------------------------------------------------------------------------------------------------------------------------------------------------------------------------------------------|----------------------------------------------------------------------------------------------------------------------------------------------|
| He <i>et al.</i> (2009) (37)         | N=16 healthy Chinese volunteers                      | Atorvastatin 40 mg (+ rifampicin 600 mg) | When combined with concomitant rifampicin, Atorvastatin AUC increased among V174A carriers and WT patients compared to V174A homozygotes                                                                                                                                                                  | Rifampicin PK not affected by variation in SLCO1B1 genotype.                                                                                 |
| Ide <i>et al.</i> (2009) (50)        | N=57 healthy Japanese male volunteers                | Pravastatin                              | Relative bioavailability F <sub>(rel)</sub> increased for pravastatin in carriers of the compound N130D + V174A variant, and in homozygotes, versus WT.                                                                                                                                                   | Since compound N130D + V174A genotype alters F <sub>(rel)</sub> , OATP1B1 is one of the determinants of systemic exposure to pravastatin.    |
| Wen <i>et al.</i> (2010) (67)        | N=18 healthy Chinese volunteers                      | Pitavastatin 2 mg                        | Pitavastatin AUC, C <sub>max</sub> increased with N130D carriers compared to wild type (WT).                                                                                                                                                                                                              | Pitavastatin CL was reduced in N130D carriers. No differences according to genotype were observed in T <sub>1/2</sub> and T <sub>max</sub> . |
| Lee <i>et al.</i> (2010) (136)       | N=290 Korean volunteers                              | Atorvastatin 20 mg                       | Mean AUC of atorvastatin and 2-hydroxyatorvastatin was larger for compound N130D + V174A homozygotes (n = 3), than for N130D + V174A carriers (n = 8), and also larger than patients with WT. No PK difference with atorvastatin lactone was found.                                                       | This study showed the compound N130D + V174A variant may be associated with individual difference in the AUC of atorvastatin.                |
| Marciante <i>et al.</i> (2011) (137) | 185 cases of rhabdomyolysis compared to 732 controls | Cerivastatin at various doses            | Permutation test results suggested an association between cerivastatin-associated rhabdomyolysis and SLCO1B1 variants (P=0.002), but not CYP2C8 variants (P=0.073) or UGTs (P=0.523). The V174A allele was associated with risk of rhabdomyolysis (odds ratio: 1.89; 95% confidence interval: 1.40-2.56). | In transfected cells, V174A allele reduced cerivastatin transport by 40% compared with the reference transporter (P<0.001).                  |

**Supplemental Table S7. FDA Dosing Recommendations for Simvastatin, posted in 2013**

| Warning(s) Regarding 80 mg Simvastatin                                                                                                                                                                                                                                                                                                                                                                                                                                                                                                                                                                | Simvastatin Contraindicated                                                                                                                                                                                                                                                                                                    | Maximum Simvastatin Dose                                                                                  |                                                                                                                                   |
|-------------------------------------------------------------------------------------------------------------------------------------------------------------------------------------------------------------------------------------------------------------------------------------------------------------------------------------------------------------------------------------------------------------------------------------------------------------------------------------------------------------------------------------------------------------------------------------------------------|--------------------------------------------------------------------------------------------------------------------------------------------------------------------------------------------------------------------------------------------------------------------------------------------------------------------------------|-----------------------------------------------------------------------------------------------------------|-----------------------------------------------------------------------------------------------------------------------------------|
|                                                                                                                                                                                                                                                                                                                                                                                                                                                                                                                                                                                                       |                                                                                                                                                                                                                                                                                                                                | Max 10 mg daily<br>(20 mg dose is contraindicated)                                                        | Max 20 mg daily<br>(40 mg dose is contraindicated)                                                                                |
| <ul style="list-style-type: none"> <li>• Simvastatin 80 mg should not be started in new patients</li> <li>• It is acceptable to continue simvastatin 80 mg daily in patients who have been taking it for 12 months or more without side effects</li> <li>• Switch patients requiring a drug that interacts with simvastatin to an alternative statin with less potential for drug-drug interaction</li> <li>• Patients unable to achieve their LDL-C goal utilizing the 40 mg dose should not be titrated to the 80 mg dose, but should be placed on alternative LDL-C lowering treatments</li> </ul> | <ul style="list-style-type: none"> <li>• Itraconazole, Ketoconazole, Posaconazole, Voriconazole</li> <li>• Erythromycin, Clarithromycin, Telithromycin</li> <li>• HIV Protease inhibitors</li> <li>• Boceprevir, Telaprevir</li> <li>• Nefazodone</li> <li>• Gemfibrozil</li> <li>• Cyclosporine</li> <li>• Danazol</li> </ul> | <ul style="list-style-type: none"> <li>• Verapamil</li> <li>• Diltiazem</li> <li>• Dronedarone</li> </ul> | <ul style="list-style-type: none"> <li>• Amiodarone</li> <li>• Amlodipine</li> <li>• Ranolazine</li> <li>• Lomitapide*</li> </ul> |
| <p>*For patients with homozygous familial hypercholesterolemia (HoFH) taking lomitapide, do not exceed 20 mg simvastatin daily, except for patients with HoFH who have taken 80 mg simvastatin chronically for <math>\geq 12</math> months without muscle toxicity, who should not exceed 40 mg of simvastatin daily when lomitapide is prescribed concomitantly</p>                                                                                                                                                                                                                                  |                                                                                                                                                                                                                                                                                                                                |                                                                                                           |                                                                                                                                   |

**Supplemental Table S8. Drug(s) that pertain to this guideline.**

| <b>Drug or Ingredient</b> | <b>Source</b> | <b>Code Type</b> | <b>Code</b> |
|---------------------------|---------------|------------------|-------------|
| Simvastatin               | RxNorm        | RxCUI            | 36567       |
| Simvastatin               | DrugBank      | Accession Number | DB00641     |
| Simvastatin               | ATC           | ATC Code         | C10AA01     |
| Simvastatin               | PharmGKB      | PharmGKB ID      | PA451363    |

**Supplemental Table S9. Gene(s) that pertain to this guideline**

| <b>Gene Symbol</b> | <b>Source</b> | <b>Code Type</b> | <b>Code</b>     |
|--------------------|---------------|------------------|-----------------|
| <i>SLCO1B1</i>     | HGNC          | Symbol           | SLCO1B1         |
| <i>SLCO1B1</i>     | HGNC          | HGNC ID          | HGNC10959       |
| <i>SLCO1B1</i>     | NCBI          | Gene ID          | 10599           |
| <i>SLCO1B1</i>     | Ensembl       | Ensembl ID       | ENSG00000134538 |
| <i>SLCO1B1</i>     | PharmGKB      | PharmGKB ID      | PA134865839     |

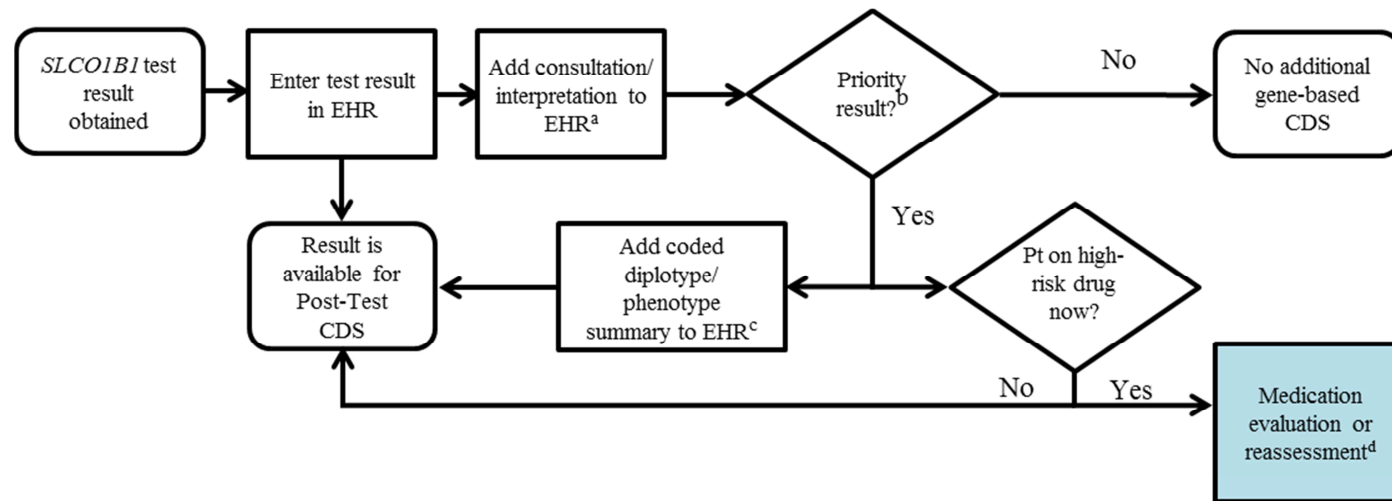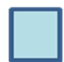

Blue shading indicates interaction with provider

### Supplemental Figure S2. *SLCO1B1* Pharmacogenetic Test Result: Clinical Implementation Workflow for EHR

<sup>a</sup> See **Supplementary Table S10** for diplotype/phenotype specific example

<sup>b</sup> "Priority result" is defined as a genetic test result that necessitates a change in drug, drug dose, or drug monitoring now or potentially in the future.

<sup>c</sup> Documentation in the EHR is institution specific. Optimally, the phenotype and/or genotype are available in the EHR to permanently inform prescribing decisions. See **Supplementary Table S10** for genotype/phenotype-specific summaries.

<sup>d</sup> See supplement section "Other Considerations" for discussion regarding use of simvastatin using the information of a patient's *SLCO1B1* genotype test result.

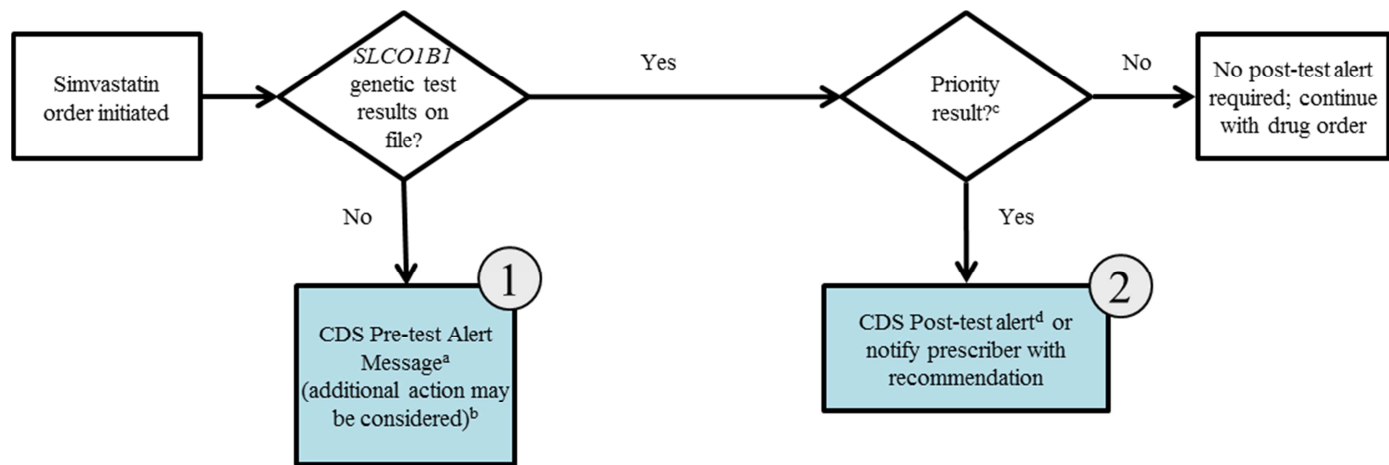

Note: Circled numerals refer to **Supplementary Table 11**

### Supplemental Figure S3. *SLCO1B1* Genotype and Simvastatin: Point of Care Clinical Decision Support

<sup>a</sup> See **Supplementary Table S11** for diplotype/phenotype specific pre-test alert example.

<sup>b</sup> Additional actions may include ordering a pharmacogenetic test, preventing the clinician from ordering the medication or allowing the clinician to cancel out of the alert.

<sup>c</sup> Priority result defined as a genetic test result that results in a change in drug, drug dose, or drug monitoring.

<sup>d</sup> See **Supplementary Table S11** for diplotype/phenotype specific post-test alert example.

**Translation table:**

**Supplemental Table S10. Example Implementation of this Guideline: Pharmacogenetic Diplotype/Phenotype Summary**

**Entries<sup>a</sup>**

| Diplotype Test Result for <i>SLCO1B1</i> | Coded Diplotype/Phenotype Summary <sup>b</sup> | EHR Priority Result Notation <sup>c</sup> | Consultation (Interpretation) Text Provided with Test Result <sup>d</sup>                                                                                                                                                                                                                                                                                                                                                                                                                                                                                                                                                                                                                                                                                        |
|------------------------------------------|------------------------------------------------|-------------------------------------------|------------------------------------------------------------------------------------------------------------------------------------------------------------------------------------------------------------------------------------------------------------------------------------------------------------------------------------------------------------------------------------------------------------------------------------------------------------------------------------------------------------------------------------------------------------------------------------------------------------------------------------------------------------------------------------------------------------------------------------------------------------------|
| *1a/*1a                                  | None                                           | Normal/Routine/<br>Low Risk               | This result signifies that the patient has two copies of a wild type (normal function) allele. Based on the genotype result, this patient is predicted to have normal <i>SLCO1B1</i> function. This means that there is no reason to adjust the dose of most medications that are affected by <i>SLCO1B1</i> (including simvastatin) on the basis of <i>SLCO1B1</i> genetic status. Please consult a clinical pharmacist for more specific information about how <i>SLCO1B1</i> function influences drug dosing.                                                                                                                                                                                                                                                 |
| *1b/*1b                                  | None                                           | Normal/Routine/<br>Low Risk               | This result signifies that the patient has two copies of a wild type (normal function) allele. Based on the genotype result, this patient is predicted to have normal <i>SLCO1B1</i> function. This means that there is no reason to adjust the dose of most medications that are affected by <i>SLCO1B1</i> (including simvastatin) on the basis of <i>SLCO1B1</i> genetic status. Please consult a clinical pharmacist for more specific information about how <i>SLCO1B1</i> function influences drug dosing.                                                                                                                                                                                                                                                 |
| *1a/*1b                                  | None                                           | Normal/Routine/<br>Low Risk               | This result signifies that the patient has two copies of a wild type (normal function) allele. Based on the genotype result, this patient is predicted to have normal <i>SLCO1B1</i> function. This means that there is no reason to adjust the dose of most medications that are affected by <i>SLCO1B1</i> (including simvastatin) on the basis of <i>SLCO1B1</i> genetic status. Please consult a clinical pharmacist for more specific information about how <i>SLCO1B1</i> function influences drug dosing.                                                                                                                                                                                                                                                 |
| *1a/*5                                   | SLCO1B1 -<br>Intermediate Function             | Abnormal/Priority<br>/<br>High Risk       | This result signifies that the patient has one copy of a wild type (normal function) allele (*1a) and one copy of a decreased function allele (*5). Based on the genotype result, this patient is predicted to have intermediate <i>SLCO1B1</i> function. This patient may be at risk for an adverse response to medications that are affected by <i>SLCO1B1</i> . To avoid an untoward drug response, dose adjustments may be necessary for medications affected by <i>SLCO1B1</i> . If simvastatin is prescribed to a patient with intermediate <i>SLCO1B1</i> function, there is an increased risk for developing simvastatin-associated myopathy; such patients may need a lower starting dose of simvastatin or an alternate statin agent. Please consult a |

|         |                                 |                              |                                                                                                                                                                                                                                                                                                                                                                                                                                                                                                                                                                                                                                                                                                                               |
|---------|---------------------------------|------------------------------|-------------------------------------------------------------------------------------------------------------------------------------------------------------------------------------------------------------------------------------------------------------------------------------------------------------------------------------------------------------------------------------------------------------------------------------------------------------------------------------------------------------------------------------------------------------------------------------------------------------------------------------------------------------------------------------------------------------------------------|
|         |                                 |                              | clinical pharmacist for more specific information about how SLCO1B1 function influences drug dosing.                                                                                                                                                                                                                                                                                                                                                                                                                                                                                                                                                                                                                          |
| *1a/*15 | SLCO1B1 - Intermediate Function | Abnormal/Priority /High Risk | This result signifies that the patient has one copy of a wild type (normal function) allele (*1a) and one copy of a decreased function allele (*15). Based on the genotype result, this patient is predicted to have intermediate SLCO1B1 function. This patient may be at risk for an adverse response to medications that are affected by SLCO1B1. If simvastatin is prescribed to a patient with intermediate SLCO1B1 function, there is an increased risk for developing simvastatin-associated myopathy; such patients may need a lower starting dose of simvastatin or an alternate statin agent. Please consult a clinical pharmacist for more specific information about how SLCO1B1 function influences drug dosing. |
| *1a/*17 | SLCO1B1 - Intermediate Function | Abnormal/Priority /High Risk | This result signifies that the patient has one copy of a wild type (normal function) allele (*1a) and one copy of a decreased function allele (*17). Based on the genotype result, this patient is predicted to have intermediate SLCO1B1 function. This patient may be at risk for an adverse response to medications that are affected by SLCO1B1. If simvastatin is prescribed to a patient with intermediate SLCO1B1 function, there is an increased risk for developing simvastatin-associated myopathy; such patients may need a lower starting dose of simvastatin or an alternate statin agent. Please consult a clinical pharmacist for more specific information about how SLCO1B1 function influences drug dosing. |
| *1b/*5  | SLCO1B1 - Intermediate Function | Abnormal/Priority /High Risk | This result signifies that the patient has one copy of a wild type (normal function) allele (*1b) and one copy of a decreased function allele (*5). Based on the genotype result, this patient is predicted to have intermediate SLCO1B1 function. This patient may be at risk for an adverse response to medications that are affected by SLCO1B1. If simvastatin is prescribed to a patient with intermediate SLCO1B1 function, there is an increased risk for developing simvastatin-associated myopathy; such patients may need a lower starting dose of simvastatin or an alternate statin agent. Please consult a clinical pharmacist for more specific information about how SLCO1B1 function influences drug dosing.  |
| *1b/*15 | SLCO1B1 - Intermediate Function | Abnormal/Priority /High Risk | This result signifies that the patient has one copy of a wild type (normal function) allele (*1b) and one copy of a decreased function allele (*15). Based on the genotype result, this patient is predicted to have intermediate SLCO1B1 function. This patient may be at risk for an adverse response to medications that are affected by SLCO1B1. If simvastatin is prescribed to a patient with intermediate SLCO1B1 function, there is an increased risk for developing simvastatin-associated myopathy; such patients may need a lower starting dose of simvastatin or an alternate statin agent. Please consult a clinical pharmacist for more specific information about how SLCO1B1 function influences drug dosing. |
| *1b/*17 | SLCO1B1 - Intermediate Function | Abnormal/Priority /High Risk | This result signifies that the patient has one copy of a wild type (normal function) allele (*1b) and one copy of a decreased function allele (*17). Based on the genotype result, this                                                                                                                                                                                                                                                                                                                                                                                                                                                                                                                                       |

|         |                        |                              |                                                                                                                                                                                                                                                                                                                                                                                                                                                                                                                                                                                                                                                                                                             |
|---------|------------------------|------------------------------|-------------------------------------------------------------------------------------------------------------------------------------------------------------------------------------------------------------------------------------------------------------------------------------------------------------------------------------------------------------------------------------------------------------------------------------------------------------------------------------------------------------------------------------------------------------------------------------------------------------------------------------------------------------------------------------------------------------|
|         |                        |                              | patient is predicted to have intermediate SLCO1B1 function. This patient may be at risk for an adverse response to medications that are affected by SLCO1B1. If simvastatin is prescribed to a patient with intermediate SLCO1B1 function, there is an increased risk for developing simvastatin-associated myopathy; such patients may need a lower starting dose of simvastatin or an alternate statin agent and creatine kinase levels may need to be monitored routinely. Please consult a clinical pharmacist for more specific information about how SLCO1B1 function influences drug dosing.                                                                                                         |
| *5/*5   | SLCO1B1 - Low Function | Abnormal/Priority /High Risk | This result signifies that the patient has two copies of a decreased function allele. Based on the genotype result, this patient is predicted to have low SLCO1B1 function. This patient may be at a high risk for an adverse response to medications that are affected by SLCO1B1. If simvastatin is prescribed to a patient with low SLCO1B1 function, there is a high risk of developing simvastatin-associated myopathy; such patients may need a lower starting dose of simvastatin or an alternate statin agent, and creatine kinase levels may need to be monitored routinely. Please consult a clinical pharmacist for more specific information about how SLCO1B1 function influences drug dosing. |
| *5/*15  | SLCO1B1 - Low Function | Abnormal/Priority /High Risk |                                                                                                                                                                                                                                                                                                                                                                                                                                                                                                                                                                                                                                                                                                             |
| *5/*17  | SLCO1B1 - Low Function | Abnormal/Priority /High Risk |                                                                                                                                                                                                                                                                                                                                                                                                                                                                                                                                                                                                                                                                                                             |
| *15/*15 | SLCO1B1 - Low Function | Abnormal/Priority /High Risk |                                                                                                                                                                                                                                                                                                                                                                                                                                                                                                                                                                                                                                                                                                             |
| *15/*17 | SLCO1B1 - Low Function | Abnormal/Priority /High Risk |                                                                                                                                                                                                                                                                                                                                                                                                                                                                                                                                                                                                                                                                                                             |
| *17/*17 | SLCO1B1 - Low Function | Abnormal/Priority /High Risk |                                                                                                                                                                                                                                                                                                                                                                                                                                                                                                                                                                                                                                                                                                             |

This table is provided to show examples of how a test result could be translated into discrete fields within an EHR, including a brief interpretation that summarized the result. The information presented here is consistent with the guideline but may need to be adapted to a given EHR's design and capabilities. Various EHRs or organizations may require different terms, and so different options are provided.

<sup>a</sup>A more comprehensive table of genotype/phenotype EHR entries for possible diplotype combinations of all variants listed in **Supplemental Table S2** is available at PharmGKB <http://www.pharmgkb.org/guideline/PA166105005>.

<sup>b</sup>The coded diplotype/phenotype summary is used to store an interpretation of the test result. This is a design decision that may differ among sites.

<sup>c</sup>For this example, a priority result is defined as a genetic test result that results in a change in drug, drug dose, or drug monitoring.

<sup>d</sup>The specific wording of the interpretive text may differ among sites.



**Supplemental Table S11. Example Implementation of this Guideline: Point of Care Clinical Decision Support**

| Flow Chart Reference Point<br>(See Supplemental Figure S3) | CDS Context,<br>Relative to<br>Genetic<br>Testing | Trigger<br>Condition                   | CDS Alert Text <sup>a</sup>                                                                                                                                                                                                                                                                                                                                                                                   |
|------------------------------------------------------------|---------------------------------------------------|----------------------------------------|---------------------------------------------------------------------------------------------------------------------------------------------------------------------------------------------------------------------------------------------------------------------------------------------------------------------------------------------------------------------------------------------------------------|
| 1                                                          | Pre-Test                                          | No<br><i>SLCO1B1</i><br>result on file | <i>SLCO1B1</i> diplotype may be important for simvastatin side effects. An <i>SLCO1B1</i> genotype does not appear to have been ordered for this patient. Use of an alternative statin or dose may be recommended. Please consult a clinical pharmacist <sup>b</sup> for more information.                                                                                                                    |
| 2                                                          | Post-Test                                         | SLCO1B1 -<br>Intermediate<br>Function  | Based on the genotype result, this patient is predicted to have intermediate SLCO1B1 function and may be at increased risk for developing simvastatin-associated myopathy. Consider starting with a lower dose of simvastatin (20 mg/day for adults) or choosing an alternate statin agent. Monitor creatine kinase levels routinely. Please consult a clinical pharmacist <sup>b</sup> for more information. |
| 2                                                          | Post-Test                                         | SLCO1B1 –<br>Low Function              | Based on the genotype result, this patient is predicted to have low SLCO1B1 function and may be at high risk for developing simvastatin-associated myopathy. Consider starting with a lower dose of simvastatin (20 mg/day for adults) or choosing an alternate statin agent. Monitor creatine kinase levels routinely. Please consult a clinical pharmacist <sup>b</sup> for more information.               |

<sup>a</sup>The specific wording of the alert text may differ among sites.

<sup>b</sup>Pharmacist, pharmacologist, or a clinician with pharmacogenetic expertise/training.

## References

- (1) Valdes, R., Payne, D.A., Linder, M.W. Laboratory analysis and application of pharmacogenetics to clinical practice. (NACB, Washington, D.C., 2010).
- (2) Relling, M.V. & Klein, T.E. CPIC: Clinical Pharmacogenetics Implementation Consortium of the Pharmacogenomics Research Network. *Clin Pharmacol Ther* **89**, 464-7 (2011).
- (3) Relling, M.V. *et al.* Clinical Pharmacogenetics Implementation Consortium guidelines for thiopurine methyltransferase genotype and thiopurine dosing. *Clin Pharmacol Ther* **89**, 387-91 (2011).
- (4) Scott, S.A. *et al.* Clinical Pharmacogenetics Implementation Consortium Guidelines for Cytochrome P450-2C19 (CYP2C19) Genotype and Clopidogrel Therapy. *Clin Pharmacol Ther*, (2011).
- (5) Panel on Antiretroviral Guidelines for Adults and Adolescents. *Guidelines for the use of antiretroviral agents in HIV-1-infected adults and adolescents. December 1, 2009; 1-161. Page 2, Table #2.*  
<<http://www.aidsinfo.nih.gov/ContentFiles/AdultandAdolescentGL.pdf>>. Accessed June 25, 2006.
- (6) Zhang, W. *et al.* OATP1B1 polymorphism is a major determinant of serum bilirubin level but not associated with rifampicin-mediated bilirubin elevation. *Clin Exp Pharmacol Physiol* **34**, 1240-4 (2007).
- (7) Ieiri, I. *et al.* Influence of common variants in the pharmacokinetic genes (OATP-C, UGT1A1, and MRP2) on serum bilirubin levels in healthy subjects. *Hepatol Res* **30**, 91-5 (2004).
- (8) Ho, R.H. *et al.* Drug and bile acid transporters in rosuvastatin hepatic uptake: function, expression, and pharmacogenetics. *Gastroenterology* **130**, 1793-806 (2006).
- (9) Bielinski, S.J. *et al.* Mayo Genome Consortia: a genotype-phenotype resource for genome-wide association studies with an application to the analysis of circulating bilirubin levels. *Mayo Clin Proc* **86**, 606-14 (2011).
- (10) Johnson, A.D. *et al.* Genome-wide association meta-analysis for total serum bilirubin levels. *Hum Mol Genet* **18**, 2700-10 (2009).
- (11) Huang, C.S., Huang, M.J., Lin, M.S., Yang, S.S., Teng, H.C. & Tang, K.S. Genetic factors related to unconjugated hyperbilirubinemia amongst adults. *Pharmacogenetics and genomics* **15**, 43-50 (2005).
- (12) Srivastava, A., Srivastava, N., Choudhuri, G. & Mittal, B. Organic anion transporter 1B1 (SLCO1B1) polymorphism and gallstone formation: High incidence of Exon4 CA genotype in female patients in North India. *Hepatol Res* **41**, 71-8 (2011).
- (13) Lin, R. *et al.* Association of polymorphisms in the solute carrier organic anion transporter family member 1B1 gene with essential hypertension in the Uyghur population. *Ann Hum Genet* **75**, 305-11 (2011).
- (14) Lin, R. *et al.* Common variants of four bilirubin metabolism genes and their association with serum bilirubin and coronary artery disease in Chinese Han population. *Pharmacogenetics and genomics* **19**, 310-8 (2009).
- (15) Han, J.Y. *et al.* Influence of the organic anion-transporting polypeptide 1B1 (OATP1B1) polymorphisms on irinotecan-pharmacokinetics and clinical outcome of patients with advanced non-small cell lung cancer. *Lung Cancer* **59**, 69-75 (2008).

- (16) Zhang, W. *et al.* Role of BCRP 421C>A polymorphism on rosuvastatin pharmacokinetics in healthy Chinese males. *Clinica chimica acta; international journal of clinical chemistry* **373**, 99-103 (2006).
- (17) Lubomirov, R. *et al.* Association of pharmacogenetic markers with premature discontinuation of first-line anti-HIV therapy: an observational cohort study. *J Infect Dis* **203**, 246-57 (2011).
- (18) Weiner, M. *et al.* Effects of tuberculosis, race, and human gene SLCO1B1 polymorphisms on rifampin concentrations. *Antimicrob Agents Chemother* **54**, 4192-200 (2010).
- (19) Backman, J.T., Kyrklund, C., Neuvonen, M. & Neuvonen, P.J. Gemfibrozil greatly increases plasma concentrations of cerivastatin. *Clin Pharmacol Ther* **72**, 685-91 (2002).
- (20) Ronaldson, K.J., O'Shea, J.M. & Boyd, I.W. Risk factors for rhabdomyolysis with simvastatin and atorvastatin. *Drug safety : an international journal of medical toxicology and drug experience* **29**, 1061-7 (2006).
- (21) Rowan, C. *et al.* Rhabdomyolysis reports show interaction between simvastatin and CYP3A4 inhibitors. *Pharmacoepidemiology and drug safety* **18**, 301-9 (2009).
- (22) Schneck, D.W. *et al.* The effect of gemfibrozil on the pharmacokinetics of rosuvastatin. *Clin Pharmacol Ther* **75**, 455-63 (2004).
- (23) Backman, J.T., Kyrklund, C., Kivisto, K.T., Wang, J.S. & Neuvonen, P.J. Plasma concentrations of active simvastatin acid are increased by gemfibrozil. *Clinical pharmacology and therapeutics* **68**, 122-9 (2000).
- (24) Lee, E. *et al.* Rosuvastatin pharmacokinetics and pharmacogenetics in white and Asian subjects residing in the same environment. *Clin Pharmacol Ther* **78**, 330-41 (2005).
- (25) Neuvonen, P.J., Niemi, M. & Backman, J.T. Drug interactions with lipid-lowering drugs: mechanisms and clinical relevance. *Clinical pharmacology and therapeutics* **80**, 565-81 (2006).
- (26) Hermann, M., Asberg, A., Christensen, H., Holdaas, H., Hartmann, A. & Reubsæet, J.L. Substantially elevated levels of atorvastatin and metabolites in cyclosporine-treated renal transplant recipients. *Clinical pharmacology and therapeutics* **76**, 388-91 (2004).
- (27) Stein, C.M., Sadeque, A.J., Murray, J.J., Wandel, C., Kim, R.B. & Wood, A.J. Cyclosporine pharmacokinetics and pharmacodynamics in African American and white subjects. *Clinical pharmacology and therapeutics* **69**, 317-23 (2001).
- (28) Capone, D., Stanziale, P., Gentile, A., Imperatore, P., Pellegrino, T. & Basile, V. Effects of simvastatin and pravastatin on hyperlipidemia and cyclosporin blood levels in renal transplant recipients. *Am J Nephrol* **19**, 411-5 (1999).
- (29) Lepre, F., Rigby, R., Hawley, C., Saltissi, D., Brown, A. & Walsh, Z. A double-blind placebo controlled trial of simvastatin for the treatment of dyslipidaemia in renal allograft recipients. *Clin Transplant* **13**, 520-5 (1999).
- (30) Pflugfelder, P.W., Huff, M., Oskalns, R., Rudas, L. & Kostuk, W.J. Cholesterol-lowering therapy after heart transplantation: a 12-month randomized trial. *J Heart Lung Transplant* **14**, 613-22 (1995).
- (31) Vanhaecke, J., Van Cleemput, J., Van Lierde, J., Daenen, W. & De Geest, H. Safety and efficacy of low dose simvastatin in cardiac transplant recipients treated with cyclosporine. *Transplantation* **58**, 42-5 (1994).

- (32) Feng, Q., Wilke, R.A. & Baye, T.M. Individualized risk for statin-induced myopathy: current knowledge, emerging challenges and potential solutions. *Pharmacogenomics* **13**, 579-94 (2012).
- (33) Pasanen, M.K., Neuvonen, P.J. & Niemi, M. Global analysis of genetic variation in SLCO1B1. *Pharmacogenomics* **9**, 19-33 (2008).
- (34) Brunham, L.R. *et al.* Differential effect of the rs4149056 variant in SLCO1B1 on myopathy associated with simvastatin and atorvastatin. *The Pharmacogenomics Journal*, (2011).
- (35) Generaux, G.T., Bonomo, F.M., Johnson, M. & Doan, K.M. Impact of SLCO1B1 (OATP1B1) and ABCG2 (BCRP) genetic polymorphisms and inhibition on LDL-C lowering and myopathy of statins. *Xenobiotica* **41**, 639-51 (2011).
- (36) Giorgi, M.A., Caroli, C., Arazi, H.C. & Di Girolamo, G. Pharmacogenomics and adverse drug reactions: the case of statins. *Expert Opin Pharmacother* **12**, 1499-509 (2011).
- (37) He, Y.J. *et al.* Rifampicin alters atorvastatin plasma concentration on the basis of SLCO1B1 521T>C polymorphism. *Clinica chimica acta; international journal of clinical chemistry* **405**, 49-52 (2009).
- (38) Kalliokoski, A. & Niemi, M. Impact of OATP transporters on pharmacokinetics. *Br J Pharmacol* **158**, 693-705 (2009).
- (39) Neuvonen, P.J., Backman, J.T. & Niemi, M. Pharmacokinetic comparison of the potential over-the-counter statins simvastatin, lovastatin, fluvastatin and pravastatin. *Clin Pharmacokinet* **47**, 463-74 (2008).
- (40) Suwannakul, S. *et al.* Pharmacokinetic interaction between pravastatin and olmesartan in relation to SLCO1B1 polymorphism. *J Hum Genet* **53**, 899-904 (2008).
- (41) Pasanen, M.K., Fredrikson, H., Neuvonen, P.J. & Niemi, M. Different effects of SLCO1B1 polymorphism on the pharmacokinetics of atorvastatin and rosuvastatin. *Clin Pharmacol Ther* **82**, 726-33 (2007).
- (42) Hermann, M. *et al.* Exposure of atorvastatin is unchanged but lactone and acid metabolites are increased several-fold in patients with atorvastatin-induced myopathy. *Clinical pharmacology and therapeutics* **79**, 532-9 (2006).
- (43) Mwinyi, J., Johne, A., Bauer, S., Roots, I. & Gerloff, T. Evidence for inverse effects of OATP-C (SLC21A6) 5 and 1b haplotypes on pravastatin kinetics. *Clinical pharmacology and therapeutics* **75**, 415-21 (2004).
- (44) Niemi, M. *et al.* High plasma pravastatin concentrations are associated with single nucleotide polymorphisms and haplotypes of organic anion transporting polypeptide-C (OATP-C, SLCO1B1). *Pharmacogenetics* **14**, 429-40 (2004).
- (45) Backman, J.T., Kyrklund, C., Neuvonen, M. & Neuvonen, P.J. Gemfibrozil greatly increases plasma concentrations of cerivastatin. *Clinical pharmacology and therapeutics* **72**, 685-91 (2002).
- (46) Hamelin, B.A. & Turgeon, J. Hydrophilicity/lipophilicity: relevance for the pharmacology and clinical effects of HMG-CoA reductase inhibitors. *Trends Pharmacol Sci* **19**, 26-37 (1998).
- (47) Rehman, M.A. *et al.* Effects of simvastatin in hyperlipidemic renal transplant patients receiving cyclosporine. *Transplantation* **60**, 397-9 (1995).
- (48) Arnadottir, M., Eriksson, L.O., Germershausen, J.I. & Thysell, H. Low-dose simvastatin is a well-tolerated and efficacious cholesterol-lowering agent in ciclosporin-treated

- kidney transplant recipients: double-blind, randomized, placebo-controlled study in 40 patients. *Nephron* **68**, 57-62 (1994).
- (49) Arnadottir, M., Eriksson, L.O., Thysell, H. & Karkas, J.D. Plasma concentration profiles of simvastatin 3-hydroxy-3-methyl-glutaryl-coenzyme A reductase inhibitory activity in kidney transplant recipients with and without ciclosporin. *Nephron* **65**, 410-3 (1993).
- (50) Ide, T., Sasaki, T., Maeda, K., Higuchi, S., Sugiyama, Y. & Ieiri, I. Quantitative population pharmacokinetic analysis of pravastatin using an enterohepatic circulation model combined with pharmacogenomic Information on SLCO1B1 and ABCC2 polymorphisms. *J Clin Pharmacol* **49**, 1309-17 (2009).
- (51) Werner, M., Sacher, J. & Hohenegger, M. Mutual amplification of apoptosis by statin-induced mitochondrial stress and doxorubicin toxicity in human rhabdomyosarcoma cells. *British journal of pharmacology* **143**, 715-24 (2004).
- (52) Sacher, J., Weigl, L., Werner, M., Szegedi, C. & Hohenegger, M. Delineation of myotoxicity induced by 3-hydroxy-3-methylglutaryl CoA reductase inhibitors in human skeletal muscle cells. *The Journal of pharmacology and experimental therapeutics* **314**, 1032-41 (2005).
- (53) Dirks, A.J. & Jones, K.M. Statin-induced apoptosis and skeletal myopathy. *Am J Physiol Cell Physiol* **291**, C1208-12 (2006).
- (54) Maggo, S.D., Kennedy, M.A. & Clark, D.W. Clinical implications of pharmacogenetic variation on the effects of statins. *Drug safety : an international journal of medical toxicology and drug experience* **34**, 1-19 (2011).
- (55) Martin, N.G., Li, K.W., Murray, H., Putt, W., Packard, C.J. & Humphries, S.E. The effects of a single nucleotide polymorphism in SLCO1B1 on the pharmacodynamics of pravastatin. *Br J Clin Pharmacol* **73**, 303-6 (2012).
- (56) Santos, P.C. *et al.* SLCO1B1 rs4149056 polymorphism associated with statin-induced myopathy is differently distributed according to ethnicity in the Brazilian general population: Amerindians as a high risk ethnic group. *BMC Med Genet* **12**, 136 (2011).
- (57) Kaddurah-Daouk, R. *et al.* Enteric microbiome metabolites correlate with response to simvastatin treatment. *PLoS One* **6**, e25482 (2011).
- (58) Ho, R.H. & Kim, R.B. Transporters and drug therapy: implications for drug disposition and disease. *Clinical pharmacology and therapeutics* **78**, 260-77 (2005).
- (59) Campana, C. *et al.* Efficacy and pharmacokinetics of simvastatin in heart transplant recipients. *Ann Pharmacother* **29**, 235-9 (1995).
- (60) Rodrigues, A.C. *et al.* Pharmacogenetics of OATP Transporters Reveals That SLCO1B1 c.388A>G Variant Is Determinant of Increased Atorvastatin Response. *Int J Mol Sci* **12**, 5815-27 (2011).
- (61) Couvert, P. *et al.* Association between a frequent allele of the gene encoding OATP1B1 and enhanced LDL-lowering response to fluvastatin therapy. *Pharmacogenomics* **9**, 1217-27 (2008).
- (62) Ho, R.H. *et al.* Effect of drug transporter genotypes on pravastatin disposition in European- and African-American participants. *Pharmacogenet Genomics* **17**, 647-56 (2007).
- (63) Igel, M. *et al.* Impact of the SLCO1B1 polymorphism on the pharmacokinetics and lipid-lowering efficacy of multiple-dose pravastatin. *Clinical pharmacology and therapeutics* **79**, 419-26 (2006).

- (64) Niemi, M. *et al.* Acute effects of pravastatin on cholesterol synthesis are associated with SLCO1B1 (encoding OATP1B1) haplotype \*17. *Pharmacogenet Genomics* **15**, 303-9 (2005).
- (65) Bailey, K.M. *et al.* Hepatic metabolism and transporter gene variants enhance response to rosuvastatin in patients with acute myocardial infarction: the GEOSTAT-1 Study. *Circ Cardiovasc Genet* **3**, 276-85 (2010).
- (66) Choi, J.H., Lee, M.G., Cho, J.Y., Lee, J.E., Kim, K.H. & Park, K. Influence of OATP1B1 genotype on the pharmacokinetics of rosuvastatin in Koreans. *Clin Pharmacol Ther* **83**, 251-7 (2008).
- (67) Wen, J. & Xiong, Y. OATP1B1 388A>G polymorphism and pharmacokinetics of pitavastatin in Chinese healthy volunteers. *J Clin Pharm Ther* **35**, 99-104 (2010).
- (68) Yang, G.P. *et al.* Lack of effect of genetic polymorphisms of SLCO1B1 on the lipid-lowering response to pitavastatin in Chinese patients. *Acta pharmacologica Sinica* **31**, 382-6 (2010).
- (69) Deng, J.W. *et al.* The effect of SLCO1B1\*15 on the disposition of pravastatin and pitavastatin is substrate dependent: the contribution of transporting activity changes by SLCO1B1\*15. *Pharmacogenetics and genomics* **18**, 424-33 (2008).
- (70) Ieiri, I. *et al.* SLCO1B1 (OATP1B1, an uptake transporter) and ABCG2 (BCRP, an efflux transporter) variant alleles and pharmacokinetics of pitavastatin in healthy volunteers. *Clinical pharmacology and therapeutics* **82**, 541-7 (2007).
- (71) Chung, J.Y. *et al.* Effect of OATP1B1 (SLCO1B1) variant alleles on the pharmacokinetics of pitavastatin in healthy volunteers. *Clin Pharmacol Ther* **78**, 342-50 (2005).
- (72) Donnelly, L.A. *et al.* Common nonsynonymous substitutions in SLCO1B1 predispose to statin intolerance in routinely treated individuals with type 2 diabetes: a go-DARTS study. *Clinical pharmacology and therapeutics* **89**, 210-6 (2011).
- (73) Ramsey, L.B. *et al.* Rare versus common variants in pharmacogenetics: SLCO1B1 variation and methotrexate disposition. *Genome research*, (2011).
- (74) Shuldiner, A.R. *et al.* The Pharmacogenomics Research Network Translational Pharmacogenetics Program: overcoming challenges of real-world implementation. *Clinical pharmacology and therapeutics* **94**, 207-10 (2013).
- (75) Wilke, R.A. *et al.* The emerging role of electronic medical records in pharmacogenomics. *Clinical pharmacology and therapeutics* **89**, 379-86 (2011).
- (76) Peterson, J.F. *et al.* Electronic health record design and implementation for pharmacogenomics: a local perspective. *Genetics in medicine : official journal of the American College of Medical Genetics* **15**, 833-41 (2013).
- (77) Gottesman, O. *et al.* The Electronic Medical Records and Genomics (eMERGE) Network: past, present, and future. *Genetics in medicine : official journal of the American College of Medical Genetics* **15**, 761-71 (2013).
- (78) Kullo, I.J., Jarvik, G.P., Manolio, T.A., Williams, M.S. & Roden, D.M. Leveraging the electronic health record to implement genomic medicine. *Genetics in medicine : official journal of the American College of Medical Genetics* **15**, 270-1 (2013).
- (79) Hicks, J.K. *et al.* A clinician-driven automated system for integration of pharmacogenetic interpretations into an electronic medical record. *Clinical pharmacology and therapeutics* **92**, 563-6 (2012).

- (80) Bell, G.C. *et al.* Development and use of active clinical decision support for preemptive pharmacogenomics. *Journal of the American Medical Informatics Association : JAMIA*, (2013).
- (81) Pulley, J.M. *et al.* Operational implementation of prospective genotyping for personalized medicine: the design of the Vanderbilt PREDICT project. *Clinical pharmacology and therapeutics* **92**, 87-95 (2012).
- (82) Pasanen, M.K., Neuvonen, M., Neuvonen, P.J. & Niemi, M. SLCO1B1 polymorphism markedly affects the pharmacokinetics of simvastatin acid. *Pharmacogenet Genomics* **16**, 873-9 (2006).
- (83) Lee, E. *et al.* Rosuvastatin pharmacokinetics and pharmacogenetics in white and Asian subjects residing in the same environment. *Clin Pharmacol Ther* **78**, 330-41 (2005).
- (84) Niemi, M., Pasanen, M.K. & Neuvonen, P.J. SLCO1B1 polymorphism and sex affect the pharmacokinetics of pravastatin but not fluvastatin. *Clinical pharmacology and therapeutics* **80**, 356-66 (2006).
- (85) Pasanen, M.K., Fredrikson, H., Neuvonen, P.J. & Niemi, M. Different effects of SLCO1B1 polymorphism on the pharmacokinetics of atorvastatin and rosuvastatin. *Clin Pharmacol Ther* **82**, 726-33 (2007).
- (86) Choi, J.H., Lee, M.G., Cho, J.Y., Lee, J.E., Kim, K.H. & Park, K. Influence of OATP1B1 genotype on the pharmacokinetics of rosuvastatin in Koreans. *Clin Pharmacol Ther* **83**, 251-7 (2008).
- (87) Ho, R.H. *et al.* Effect of drug transporter genotypes on pravastatin disposition in European- and African-American participants. *Pharmacogenet Genomics* **17**, 647-56 (2007).
- (88) Niemi, M., Pasanen, M.K. & Neuvonen, P.J. Organic anion transporting polypeptide 1B1: a genetically polymorphic transporter of major importance for hepatic drug uptake. *Pharmacol Rev* **63**, 157-81 (2011).
- (89) Mwinyi, J., Johne, A., Bauer, S., Roots, I. & Gerloff, T. Evidence for inverse effects of OATP-C (SLC21A6) 5 and 1b haplotypes on pravastatin kinetics. *Clin Pharmacol Ther* **75**, 415-21 (2004).
- (90) Kameyama, Y., Yamashita, K., Kobayashi, K., Hosokawa, M. & Chiba, K. Functional characterization of SLCO1B1 (OATP-C) variants, SLCO1B1\*5, SLCO1B1\*15 and SLCO1B1\*15+C1007G, by using transient expression systems of HeLa and HEK293 cells. *Pharmacogenet Genomics* **15**, 513-22 (2005).
- (91) Katz, D.A. *et al.* Organic anion transporting polypeptide 1B1 activity classified by SLCO1B1 genotype influences atrasentan pharmacokinetics. *Clin Pharmacol Ther* **79**, 186-96 (2006).
- (92) Tirona, R.G., Leake, B.F., Merino, G. & Kim, R.B. Polymorphisms in OATP-C: identification of multiple allelic variants associated with altered transport activity among European- and African-Americans. *J Biol Chem* **276**, 35669-75 (2001).
- (93) Tirona, R.G., Leake, B.F., Wolkoff, A.W. & Kim, R.B. Human organic anion transporting polypeptide-C (SLC21A6) is a major determinant of rifampin-mediated pregnane X receptor activation. *J Pharmacol Exp Ther* **304**, 223-8 (2003).
- (94) Ramsey, L.B. *et al.* Rare versus common variants in pharmacogenetics: SLCO1B1 variation and methotrexate disposition. *Genome Res* **22**, 1-8 (2012).

- (95) Nies, A.T. *et al.* Genetics is a major determinant of expression of the human hepatic uptake transporter OATP1B1, but not of OATP1B3 and OATP2B1. *Genome Med* **5**, 1 (2013).
- (96) Michalski, C. *et al.* A naturally occurring mutation in the SLC21A6 gene causing impaired membrane localization of the hepatocyte uptake transporter. *J Biol Chem* **277**, 43058-63 (2002).
- (97) Seithel, A., Klein, K., Zanger, U.M., Fromm, M.F. & Konig, J. Non-synonymous polymorphisms in the human SLCO1B1 gene: an in vitro analysis of SNP c.1929A>C. *Molecular genetics and genomics : MGG* **279**, 149-57 (2008).
- (98) Mwinyi, J., Kopke, K., Schaefer, M., Roots, I. & Gerloff, T. Comparison of SLCO1B1 sequence variability among German, Turkish, and African populations. *Eur J Clin Pharmacol* **64**, 257-66 (2008).
- (99) Aklillu, E. *et al.* Frequency of the SLCO1B1 388A>G and the 521T>C polymorphism in Tanzania genotyped by a new LightCycler(R)-based method. *Eur J Clin Pharmacol*, (2011).
- (100) Nozawa, T. *et al.* Genetic polymorphisms of human organic anion transporters OATP-C (SLC21A6) and OATP-B (SLC21A9): allele frequencies in the Japanese population and functional analysis. *J Pharmacol Exp Ther* **302**, 804-13 (2002).
- (101) Nishizato, Y. *et al.* Polymorphisms of OATP-C (SLC21A6) and OAT3 (SLC22A8) genes: consequences for pravastatin pharmacokinetics. *Clin Pharmacol Ther* **73**, 554-65 (2003).
- (102) Chung, J.Y. *et al.* Effect of OATP1B1 (SLCO1B1) variant alleles on the pharmacokinetics of pitavastatin in healthy volunteers. *Clin Pharmacol Ther* **78**, 342-50 (2005).
- (103) Xiang, X. *et al.* Pharmacogenetics of SLCO1B1 gene and the impact of \*1b and \*15 haplotypes on irinotecan disposition in Asian cancer patients. *Pharmacogenet Genomics* **16**, 683-91 (2006).
- (104) Xu, L.Y. *et al.* Organic anion transporting polypeptide-1B1 haplotypes in Chinese patients. *Acta Pharmacol Sin* **28**, 1693-7 (2007).
- (105) Kim, E.Y. *et al.* Duplex pyrosequencing assay of the 388A>G and 521T>C SLCO1B1 polymorphisms in three Asian populations. *Clin Chim Acta* **388**, 68-72 (2008).
- (106) Kim, S.R. *et al.* Genetic variations and frequencies of major haplotypes in SLCO1B1 encoding the transporter OATP1B1 in Japanese subjects: SLCO1B1\*17 is more prevalent than \*15. *Drug Metab Pharmacokinet* **22**, 456-61 (2007).
- (107) Miura, M. *et al.* Influence of drug transporters and UGT polymorphisms on pharmacokinetics of phenolic glucuronide metabolite of mycophenolic acid in Japanese renal transplant recipients. *Ther Drug Monit* **30**, 559-64 (2008).
- (108) Ho, W.F., Koo, S.H., Yee, J.Y. & Lee, E.J. Genetic variations of the SLCO1B1 gene in the Chinese, Malay and Indian populations of Singapore. *Drug Metab Pharmacokinet* **23**, 476-82 (2008).
- (109) Tian, L. *et al.* Effect of organic anion-transporting polypeptide 1B1 (OATP1B1) polymorphism on the single- and multiple-dose pharmacokinetics of enalapril in healthy Chinese adult men. *Clin Ther* **33**, 655-63.
- (110) Rohrbacher, M., Kirchof, A., Skarke, C., Geisslinger, G. & Lotsch, J. Rapid identification of three functionally relevant polymorphisms in the OATP1B1 transporter gene using Pyrosequencing. *Pharmacogenomics* **7**, 167-76 (2006).



- (111) Pasanen, M.K., Backman, J.T., Neuvonen, P.J. & Niemi, M. Frequencies of single nucleotide polymorphisms and haplotypes of organic anion transporting polypeptide 1B1 SLCO1B1 gene in a Finnish population. *Eur J Clin Pharmacol* **62**, 409-15 (2006).
- (112) Vormfelde, S.V., Toliat, M.R., Schirmer, M., Meineke, I., Nurnberg, P. & Brockmoller, J. The polymorphisms Asn130Asp and Val174Ala in OATP1B1 and the CYP2C9 allele \*3 independently affect torsemide pharmacokinetics and pharmacodynamics. *Clin Pharmacol Ther* **83**, 815-7 (2008).
- (113) Picard, N. *et al.* The role of organic anion-transporting polypeptides and their common genetic variants in mycophenolic acid pharmacokinetics. *Clin Pharmacol Ther* **87**, 100-8.
- (114) Peters, B.J. *et al.* Pharmacogenetic interactions between ABCB1 and SLCO1B1 tagging SNPs and the effectiveness of statins in the prevention of myocardial infarction. *Pharmacogenomics* **11**, 1065-76.
- (115) Boivin, A.A., Cardinal, H., Barama, A., Pichette, V., Hebert, M.J. & Roger, M. Organic anion transporting polypeptide 1B1 (OATP1B1) and OATP1B3: genetic variability and haplotype analysis in white Canadians. *Drug Metab Pharmacokinet* **25**, 508-15.
- (116) Kameyama, Y., Yamashita, K., Kobayashi, K., Hosokawa, M. & Chiba, K. Functional characterization of SLCO1B1 (OATP-C) variants, SLCO1B1\*5, SLCO1B1\*15 and SLCO1B1\*15+C1007G, by using transient expression systems of HeLa and HEK293 cells. *PharmacogenetGenomics* **15**, 513-22 (2005).
- (117) Iwai, M., Suzuki, H., Ieiri, I., Otsubo, K. & Sugiyama, Y. Functional analysis of single nucleotide polymorphisms of hepatic organic anion transporter OATP1B1 (OATP-C). *Pharmacogenetics* **14**, 749-57 (2004).
- (118) Link, E. *et al.* SLCO1B1 variants and statin-induced myopathy--a genomewide study. *NEnglJMed* **359**, 789-99 (2008).
- (119) Brunham, L.R. *et al.* Differential effect of the rs4149056 variant in SLCO1B1 on myopathy associated with simvastatin and atorvastatin. *Pharmacogenomics J*, (2011).
- (120) Voora, D. *et al.* The SLCO1B1\*5 genetic variant is associated with statin-induced side effects. *J Am Coll Cardiol* **54**, 1609-16 (2009).
- (121) Carr, D.F. *et al.* SLCO1B1 Genetic Variant Associated With Statin-Induced Myopathy: A Proof-of-Concept Study Using the Clinical Practice Research Datalink. *Clin Pharmacol Ther* **94**, 695-701 (2013).
- (122) Danik, J.S., Chasman, D.I., MacFadyen, J.G., Nyberg, F., Barratt, B.J. & Ridker, P.M. Lack of association between SLCO1B1 polymorphisms and clinical myalgia following rosuvastatin therapy. *American heart journal* **165**, 1008-14 (2013).
- (123) Brunham, L.R. *et al.* Differential effect of the rs4149056 variant in SLCO1B1 on myopathy associated with simvastatin and atorvastatin. *Pharmacogenomics J* **12**, 233-7 (2012).
- (124) Santos, P.C. *et al.* SLCO1B1 haplotypes are not associated with atorvastatin-induced myalgia in Brazilian patients with familial hypercholesterolemia. *Eur J Clin Pharmacol* **68**, 273-9 (2012).
- (125) Puccetti, L., Ciani, F. & Auteri, A. Genetic involvement in statins induced myopathy. Preliminary data from an observational case-control study. *Atherosclerosis* **211**, 28-9 (2010).

- (126) Zhou, Q., Ruan, Z.R., Jiang, B., Yuan, H. & Zeng, S. Simvastatin pharmacokinetics in healthy Chinese subjects and its relations with CYP2C9, CYP3A5, ABCB1, ABCG2 and SLCO1B1 polymorphisms. *Die Pharmazie* **68**, 124-8 (2013).
- (127) Fu, Q. *et al.* Lack of association between SLCO1B1 polymorphism and the lipid-lowering effects of atorvastatin and simvastatin in Chinese individuals. *Eur J Clin Pharmacol* **69**, 1269-74 (2013).
- (128) Hopewell, J.C. *et al.* Impact of common genetic variation on response to simvastatin therapy among 18 705 participants in the Heart Protection Study. *European heart journal* **34**, 982-92 (2013).
- (129) Chasman, D.I., Giulianini, F., MacFadyen, J., Barratt, B.J., Nyberg, F. & Ridker, P.M. Genetic determinants of statin-induced low-density lipoprotein cholesterol reduction: the Justification for the Use of Statins in Prevention: an Intervention Trial Evaluating Rosuvastatin (JUPITER) trial. *Circ Cardiovasc Genet* **5**, 257-64 (2012).
- (130) Akao, H. *et al.* Genetic variation at the SLCO1B1 gene locus and low density lipoprotein cholesterol lowering response to pravastatin in the elderly. *Atherosclerosis* **220**, 413-7 (2012).
- (131) Takane, H. *et al.* Pharmacogenetic determinants of variability in lipid-lowering response to pravastatin therapy. *J Hum Genet* **51**, 822-6 (2006).
- (132) Zhang, W. *et al.* SLCO1B1 521T-->C functional genetic polymorphism and lipid-lowering efficacy of multiple-dose pravastatin in Chinese coronary heart disease patients. *Br J Clin Pharmacol* **64**, 346-52 (2007).
- (133) Tachibana-Iimori, R. *et al.* Effect of genetic polymorphism of OATP-C (SLCO1B1) on lipid-lowering response to HMG-CoA reductase inhibitors. *Drug Metab Pharmacokinet* **19**, 375-80 (2004).
- (134) Pasanen, M.K., Miettinen, T.A., Gylling, H., Neuvonen, P.J. & Niemi, M. Polymorphism of the hepatic influx transporter organic anion transporting polypeptide 1B1 is associated with increased cholesterol synthesis rate. *Pharmacogenet Genomics* **18**, 921-6 (2008).
- (135) Niemi, M. *et al.* Association of genetic polymorphism in ABCC2 with hepatic multidrug resistance-associated protein 2 expression and pravastatin pharmacokinetics. *Pharmacogenetics and genomics* **16**, 801-8 (2006).
- (136) Lee, S.K., Kim, Y.C., Song, S.B. & Kim, Y.S. Stabilization and translocation of p53 to mitochondria is linked to Bax translocation to mitochondria in simvastatin-induced apoptosis. *Biochem Biophys Res Commun* **391**, 1592-7 (2010).
- (137) Marciante, K.D. *et al.* Cerivastatin, genetic variants, and the risk of rhabdomyolysis. *Pharmacogenetics and genomics* **21**, 280-8 (2011).
